# Supplementary material
Source: PubMed Central journal article supplement (PMC9923602)
Supplement: PEDS_20133128SupplementaryData.pdf [file PEDS_20133128SupplementaryData.pdf]

## Supplemental Information

### SUPPLEMENTAL APPENDIX 1 SUPPLEMENTAL METHODS

#### Exclusion criteria

We excluded meta-analyses that did not include  $\geq 1$  RCT in adults and  $\geq 1$  RCT in children for any of the study end points and meta-analyses without quantitative synthesis for any of those end points. Furthermore, meta-analyses with no events in the experimental and control intervention arms in all adult or all pediatric trials or all adult and all pediatric trials were excluded only from the quantitative data synthesis because these meta-analyses could not contribute any information (12 such topics were excluded: 3 from the analysis of severe harms, 1 from the analysis for any harm, 1 from the analysis for organ system–level harms, 2 from specific harms, and 5 from mortality).

#### Characterization of Adult and Pediatric RCTs<sup>1</sup>

For trials in which the Cochrane review did not specify whether the study included adults or children, we used the following rules to define the age groups. The trial population was considered to be “adult” if all the included patients were  $>12$  years old (more specifically, if the lower age range of the included patients, as reported in the Cochrane review, was  $>12$  years and the upper age range was  $>12$  years and the upper age range was  $>20$  years); “pediatric” if all the included patients were  $<20$  years old (if the lower age range of the included patients was  $<12$  years and the upper age range was  $<20$  years); “mixed” if both patients  $<12$  and  $>20$  years old were included or if patients 12 to 20 years were included; and “unspecified” if the age of the included patients was not reported at all in

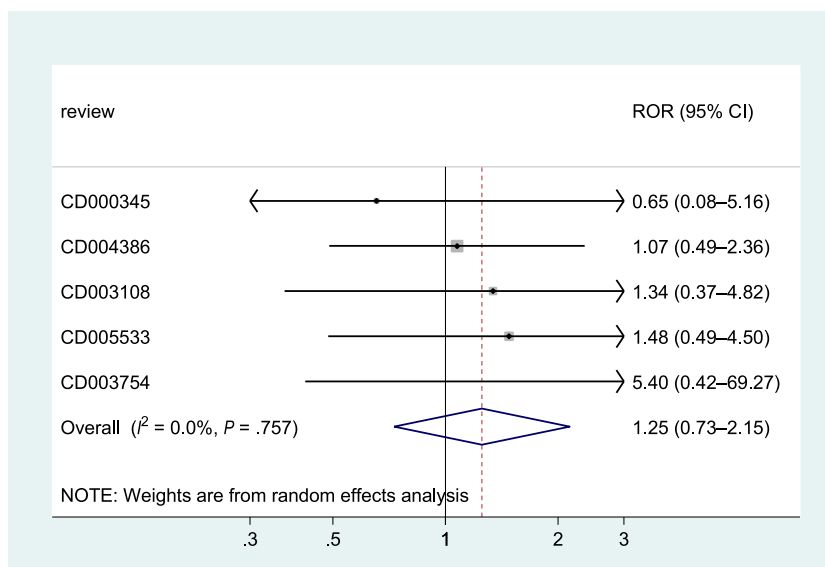

**SUPPLEMENTAL FIGURE 2**  
sROR for severe harms.

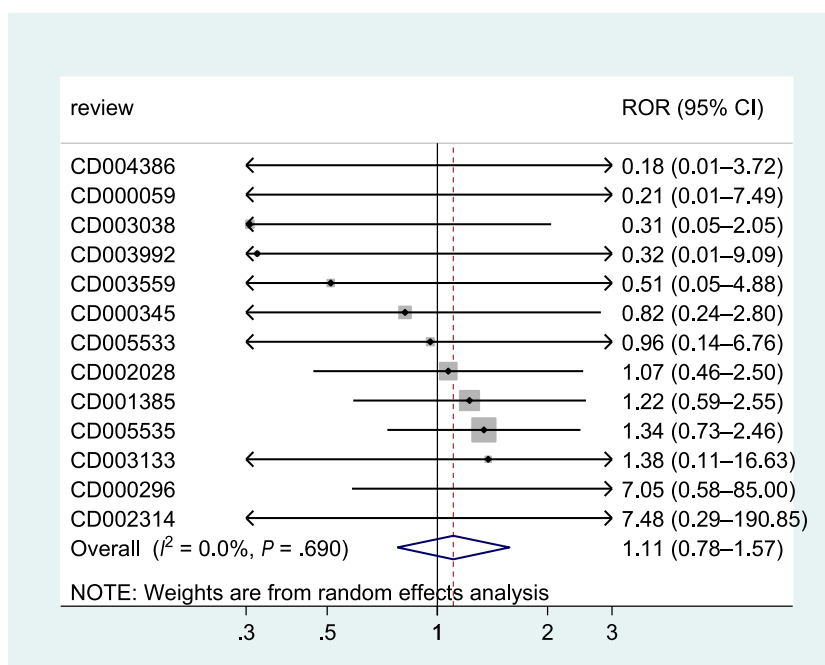

**SUPPLEMENTAL FIGURE 3**  
sROR for withdrawals due to harms.

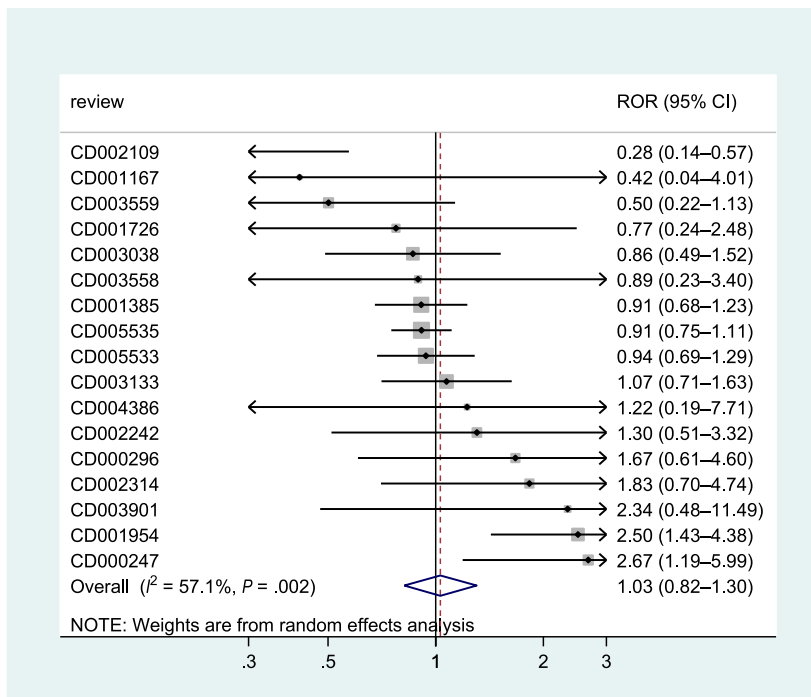

**SUPPLEMENTAL FIGURE 4**  
sROR for any harm.

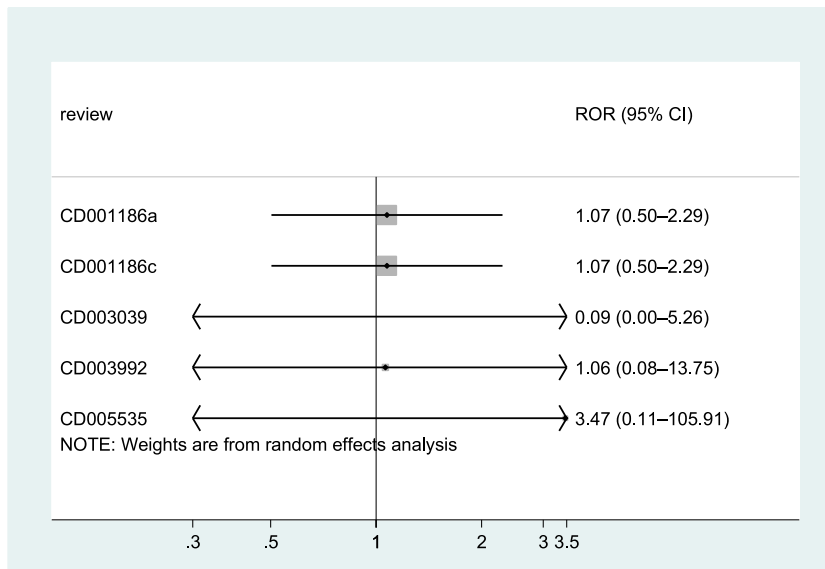

**SUPPLEMENTAL FIGURE 5**  
Individual RORs for organ system-level harms.

the Cochrane review. We excluded mixed age group ( $n = 75$ ) and unspecified age group studies ( $n = 69$ ).

### Categorization of Interventions Into Experimental and Control<sup>1</sup>

The identification of the experimental and control intervention when 2 active

interventions were compared was based on the interpretation of the authors of the Cochrane review. If this was not clear, we identified which intervention had been first discovered according to Merck Index 2006 and/or Wikipedia, and this was considered the control intervention.

### Meta-Analyses With Zero Events

When there were zero events for both the experimental and control arm for all adult or all pediatric or all adult and pediatric trials, RORs were not calculated (11 of 176 meta-analyses; 6%).

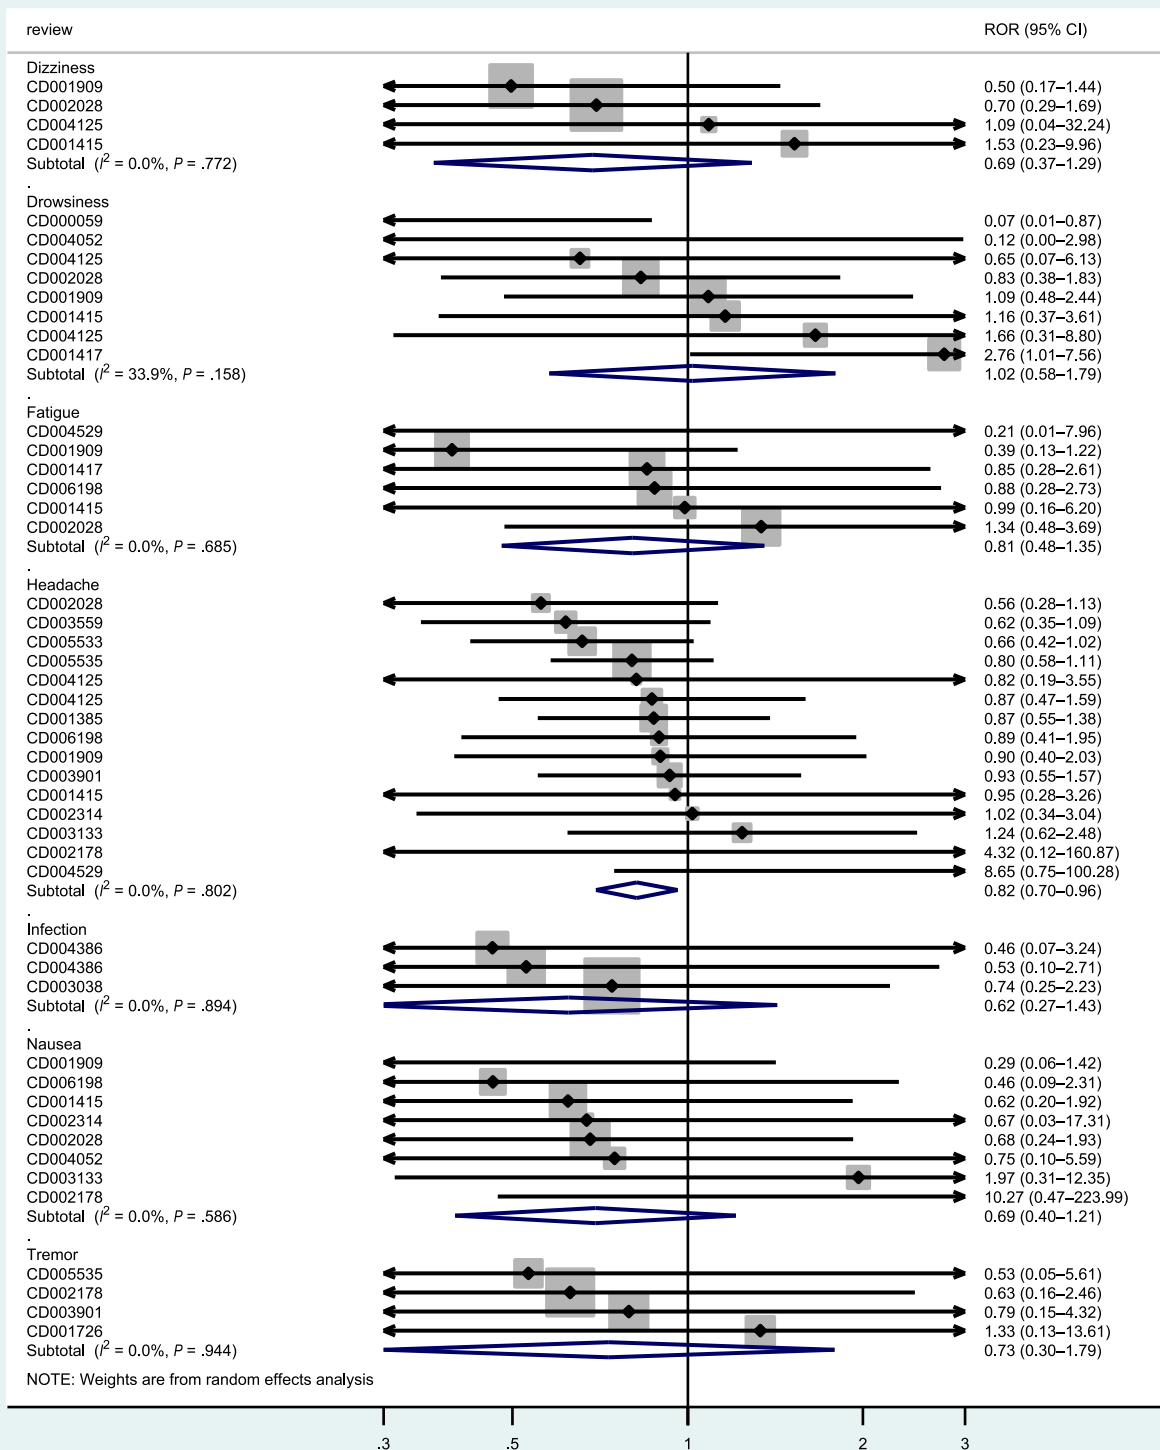**SUPPLEMENTAL FIGURE 6**

sROR for specific harms (shown only those with  $\geq 4$  meta-analyses per specific harm that were quantitatively synthesized).

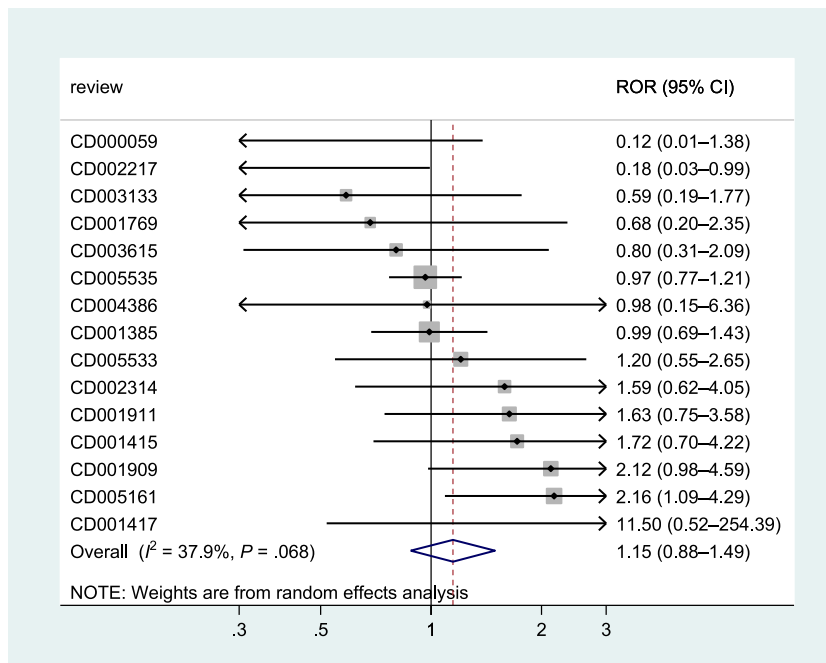

**SUPPLEMENTAL FIGURE 7**  
sROR for withdrawals for any reason.

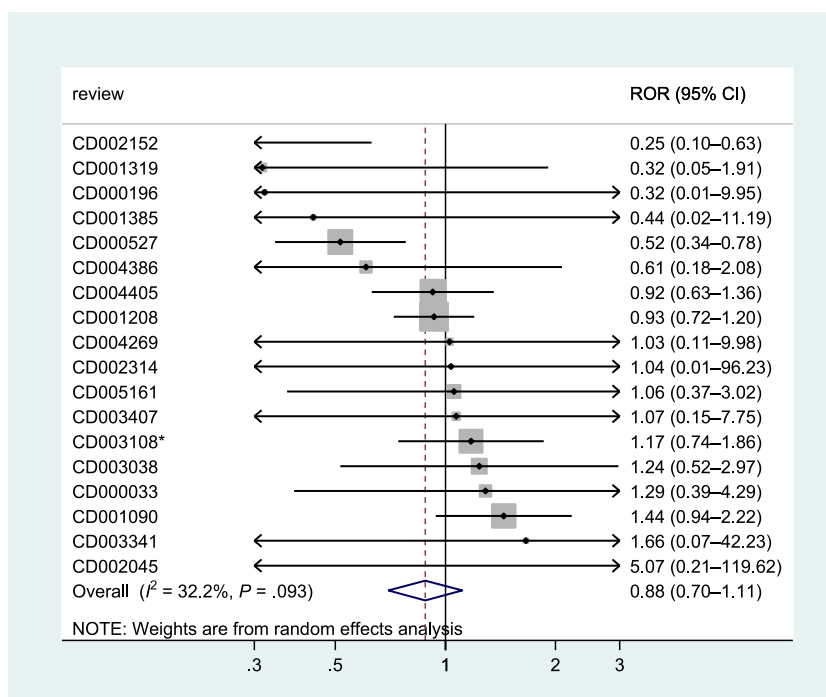

**SUPPLEMENTAL FIGURE 8**  
sROR for mortality.

**SUPPLEMENTAL TABLE 3** Characteristics of Included Systematic Reviews

| Topics                           | <i>n</i>                       |
|----------------------------------|--------------------------------|
| Infectious diseases              | 17 reviews (52 meta-analyses)  |
| Neurologic/psychiatric diseases  | 15 reviews (46 meta-analyses)  |
| Allergic/respiratory diseases    | 13 reviews (58 meta-analyses)  |
| Hematologic/oncologic/transplant | 4 reviews (9 meta-analyses)    |
| Intensive care                   | 3 reviews (3 meta-analyses)    |
| Other                            | 8 reviews (8 meta-analyses)    |
| Types of interventions           |                                |
| Drugs                            | 47 reviews (162 meta-analyses) |
| Vaccines                         | 1 review (7 meta-analyses)     |
| Biologic agents/immunotherapy    | 3 reviews (5 meta-analyses)    |
| Rehydration solutions            | 2 reviews (2 meta-analyses)    |
| Types of controls                |                                |
| Placebo or no treatment          | 32 reviews (114 meta-analyses) |
| Another active control agent     | 22 reviews (62 meta-analyses)  |

**SUPPLEMENTAL TABLE 4** Summary ROR for each individual Harm/Harm related endpoint; ROR adults vs children in each individual meta-analysis and OR (95% confidence intervals) for the experimental vs control intervention in adults (OR adults; LCI, UCI) and children respectively (OR peds, LCI, UCI)

| Review    | Title                                                                                                                                                       | Comparison                                                                                         | Severe adverse events                                                  | sROR  |          | UCI_sROR |         | i2        |         | OR            |             | LCI OR        |             | UCI OR      |  |
|-----------|-------------------------------------------------------------------------------------------------------------------------------------------------------------|----------------------------------------------------------------------------------------------------|------------------------------------------------------------------------|-------|----------|----------|---------|-----------|---------|---------------|-------------|---------------|-------------|-------------|--|
|           |                                                                                                                                                             |                                                                                                    |                                                                        | ROR   | LCI ROR  | ROR      | LCI ROR | OR adults | OR peds | LCI OR adults | LCI OR peds | UCI OR adults | UCI OR peds |             |  |
| CD000345  | Sequential combination of glucocorticosteroids and alfa interferon versus alfa interferon alone for HBeAg-positive chronic hepatitis B                      | Glucoc + IFN vs control + IFN                                                                      | Severe adverse events                                                  | .6542 | .083     | 5.158    | 2.15    | .8863     | 0%      | 2.17          | 1.355       | .2107         | 2.107       | 8.71        |  |
| CD004386  | Antibiotic prophylaxis for bacterial infections in atebriile neutropenic patients following chemotherapy                                                    | Drug vs placebo/no intervention                                                                    | Serious adverse events                                                 | 1.073 | .4886    | 2.357    | 1.759   | 1.345     | 2.301   | 1.639         | .7824       | 3.453         |             |             |  |
| CD003108* | Cotrimoxazole prophylaxis for opportunistic infections in adults with HIV (combined with pediatric CD0003508)                                               | Cotrimoxazole vs control                                                                           | Adverse events (causing discontinuation of therapy or hospitalization) | 1.338 | .3714    | 4.824    | 1.199   | .4086     | 3.52    | .896          | .4468       | 1.797         |             |             |  |
| CD005533  | Combination of inhaled long-acting beta2-agonists and inhaled steroids versus higher dose of inhaled steroids in children and adults with persistent asthma | LABA + ICS vs higher dose ICS                                                                      | Serious adverse events                                                 | 1.478 | .4859    | 4.496    | 1.126   | .8998     | 1.41    | .7621         | .2563       | 2.266         |             |             |  |
| CD003754  | Reduced osmolarity oral rehydration solution for treating cholera                                                                                           | Reduced osmolarity (glucose-based) oral rehydration solution vs standard oral rehydration solution | Severe biochemical hyponatremia (serum sodium < 125 mmol/L)            | 5.402 | .4212    | 69.27    | 1.801   | .6049     | 5.36    | .3333         | .0332       | 3.346         |             |             |  |
| CD003038  | Beta-lactam versus beta-lactam-aminoglycoside combination therapy in cancer patients with neutropenia                                                       | Beta-lactam vs beta-lactam-aminoglycoside combination therapy                                      | Severe nephrotoxicity                                                  |       |          | .1839    |         | .0308     | 1.096   |               |             |               |             |             |  |
| CD001385  | Long-acting beta2-agonists for chronic asthma in adults and children where background therapy contains varied or no inhaled corticosteroid                  | LAB2A vs placebo                                                                                   | Serious adverse event related to study drug                            |       |          |          |         |           |         | 1.89          | .8973       | 3.98          |             |             |  |
| CD001490  | Magnesium sulfate for treating exacerbations of acute asthma in the emergency de                                                                            | Intravenous MgSO4 vs placebo                                                                       | Major Side Effects                                                     |       |          |          |         |           |         |               |             |               |             |             |  |
| Review    | Title                                                                                                                                                       | Comparison                                                                                         | Discontinuations due to adverse events                                 | sROR  | LCI_sROR | UCI_sROR | i2      | ROR       | LCI ROR | UCI ROR       | OR adults   | LCI OR adults | OR peds     | UCI OR peds |  |
|           |                                                                                                                                                             |                                                                                                    |                                                                        | 1.11  | .78      | 1.57     | 0%      |           |         |               |             |               |             |             |  |

SUPPLEMENTAL TABLE 4 Continued

| Review   | Title                                                                                                                                                       | Comparison                                                                         | Severe adverse events                                                | sROR |         | LCI_sROR |      | UCI_sROR |        | i2      |        | OR   |        | pedts  |       |
|----------|-------------------------------------------------------------------------------------------------------------------------------------------------------------|------------------------------------------------------------------------------------|----------------------------------------------------------------------|------|---------|----------|------|----------|--------|---------|--------|------|--------|--------|-------|
|          |                                                                                                                                                             |                                                                                    |                                                                      | ROR  | LCI ROR | UCI ROR  | OR   | LCI OR   | UCI OR | adults  | adults | OR   | LCI OR | UCI OR | pedts |
| CD004386 | Antibiotic prophylaxis for bacterial infections in febrile neutropenic patients following chemotherapy                                                      | Drug vs placebo/no intervention                                                    | Side effects requiring discontinuation                               | .183 | 8.9e-03 | 3.72     | 2.02 | 0%       | 1.25   | 0.73    | 2.15   | 3.74 | 11.1   | .577   | 212   |
| CD000059 | Clozapine versus typical neuroleptic medication for schizophrenia                                                                                           | Clozapine vs typical antipsychotics                                                | Blood problems requiring withdrawals or leucopenia or neutropenia    | .207 | 5.7e-03 | 7.49     | 3.3  |          | .207   | 5.7e-03 | 7.49   | 20.9 | 15.9   | .735   | 345   |
| CD003038 | Beta-lactam versus beta-lactam-aminoglycoside combination therapy in cancer patients with neutropenia                                                       | Beta-lactam vs beta-lactam-aminoglycoside combination therapy                      | Discontinuation due to adverse events                                | .307 | .046    | 2.05     | .559 |          | .307   | .046    | 2.05   | .926 | 1.82   | .293   | 11.3  |
| CD003992 | Oral versus intravenous antibiotic treatment for febrile neutropenia in cancer patients                                                                     | Oral vs intravenous antibiotic therapy                                             | Adverse events requiring discontinuation of antibiotics              | .322 | .011    | 9.09     | .82  |          | .322   | .011    | 9.09   | 1.89 | 2.54   | .1     | 64.6  |
| CD003559 | Anti-IgE for chronic asthma in adults and children (inhaled or oral steroid users)                                                                          | Subcutaneous Omalizumab + steroid vs placebo + steroid                             | Withdrawal due to adverse events                                     | .511 | .054    | 4.88     | .411 |          | .511   | .054    | 4.88   | 2.31 | .803   | .188   | 3.42  |
| CD000345 | Sequential combination of glucocorticosteroids and alfa interferon versus alfa interferon alone for HBeAg-positive chronic hepatitis B                      | Glucoc + IFN vs control + IFN                                                      | Dose reduction or discontinuation of treatment due to adverse events | .816 | .238    | 2.8      | .658 |          | .816   | .238    | 2.8    | 1.13 | .806   | .266   | 2.44  |
| CD005533 | Combination of inhaled long-acting beta2-agonists and inhaled steroids versus higher dose of inhaled steroids in children and adults with persistent asthma | LABA + ICS vs higher dose ICS                                                      | Withdrawals due to adverse events                                    | .957 | .136    | 6.76     | 1.01 |          | .957   | .136    | 6.76   | 1.33 | 1.06   | .153   | 7.33  |
| CD002028 | Oxcarbazepine add-on for drug-resistant partial epilepsy                                                                                                    | Oxcarbazepine in add-on vs placebo                                                 | Withdrawals (due to side effects)                                    | 1.07 | .458    | 2.5      | 2.3  |          | 1.07   | .458    | 2.5    | 3.34 | 2.15   | 1.000  | 4.6   |
| CD001385 | Long-acting beta2-agonists for chronic asthma in adults and children where background therapy contains varied or no inhaled corticosteroid                  | LAB2A vs placebo                                                                   | Withdrawals due to adverse events                                    | 1.22 | .589    | 2.55     | 1.14 |          | 1.22   | .589    | 2.55   | 1.37 | .93    | .458   | 1.89  |
| CD005535 | Long-acting beta2-agonists versus placebo in addition to inhaled corticosteroids                                                                            | Long-acting beta2 vs placebo (both groups receiving similar dose ICS)              | Withdrawals due to adverse events                                    | 1.34 | .73     | 2.46     | 1.08 |          | 1.34   | .73     | 2.46   | 1.36 | .804   | .459   | 1.41  |
| CD003133 | Addition of anti-leukotriene agents to inhaled corticosteroids for chronic asthma                                                                           | Leukotriene receptor antagonists + ICS vs same dose of ICS in symptomatic patients | Withdrawals due to adverse events                                    | 1.38 | .114    | 16.6     | .673 |          | 1.38   | .114    | 16.6   | 1.28 | .489   | .044   | 5.43  |

| Review        | Title                                                                                                                                                       | Comparison                                                            | Severe adverse events                      | sROR        |                 | LCI_sROR        |           | UCI_sROR    |                | i2             |               | OR        |               | UCI OR        |        | LCI OR |        | UCI OR |        |
|---------------|-------------------------------------------------------------------------------------------------------------------------------------------------------------|-----------------------------------------------------------------------|--------------------------------------------|-------------|-----------------|-----------------|-----------|-------------|----------------|----------------|---------------|-----------|---------------|---------------|--------|--------|--------|--------|--------|
|               |                                                                                                                                                             |                                                                       |                                            | ROR         | LCI ROR         | UCI ROR         | UCI ROR   | adults      | OR             | adults         | adults        | adults    | adults        | adults        | adults | adults | adults | adults | adults |
| CD000296      | Budesonide for induction of remission in Crohn's disease                                                                                                    | Budesonide vs conventional steroids                                   | Withdrawals due to adverse events          | 1.25        | 0.73            | 2.15            | 0%        | 85          | .911           | .276           | 3.000         | .129      | .015          | 1.15          |        |        |        |        |        |
| CD002314      | Anti-Heukotriene agents compared to inhaled corticosteroids in the management of recurrent and/or chronic asthma in adults and children                     | Anti-Heukotriene vs inhaled glucocorticoids                           | Withdrawals due to adverse events          | 7.05        | .585            | 85              |           | 191         | 1.21           | .875           | 1.67          | .162      | 6.4e-03       | 4.06          |        |        |        |        |        |
| <b>Review</b> | <b>Title</b>                                                                                                                                                | <b>Comparison</b>                                                     | <b>Any adverse event</b>                   | <b>sROR</b> | <b>LCI_sROR</b> | <b>UCI_sROR</b> | <b>i2</b> | <b>sROR</b> | <b>LCI ROR</b> | <b>UCI ROR</b> | <b>UCI OR</b> | <b>OR</b> | <b>LCI OR</b> | <b>UCI OR</b> |        |        |        |        |        |
|               |                                                                                                                                                             |                                                                       |                                            | 1.03        | .82             | 1.3             | 0.006     |             |                |                |               |           |               |               |        |        |        |        |        |
| CD002109*     | Antibiotics for community acquired pneumonia in adult outpatients (combined with pediatric CD004874)                                                        | Clarithromycin vs erythromycin                                        | Drug-related adverse events                | .2825       | .1394           | .5723           | .3024     | .5723       | .2005          | .2005          | .4562         | 1.071     | .6029         | 1.901         |        |        |        |        |        |
| CD001167      | Antibiotics for treating salmonella gut infections                                                                                                          | Any antibiotics vs placebo                                            | Adverse events                             | .4165       | .0433           | 4.006           | 1.274     | 4.006       | .7694          | .7694          | 2.111         | 3.06      | .3367         | 27.81         |        |        |        |        |        |
| CD003559      | Anti-IgE for chronic asthma in adults and children (inhaled or oral steroid users)                                                                          | Subcutaneous Omalizumab + steroid vs placebo + steroid                | Number of participants with adverse events | .5018       | .2223           | 1.133           | 1.035     | 1.133       | .7893          | .7893          | 1.358         | 2.063     | .9575         | 4.445         |        |        |        |        |        |
| CD001726      | Beta2-agonists for acute bronchitis                                                                                                                         | B2 agonists vs Control                                                | Other Side effects                         | .7743       | .2422           | 2.475           | .7883     | 2.475       | .3373          | .3373          | 1.842         | 1.018     | .4603         | 2.252         |        |        |        |        |        |
| CD003038      | Beta-lactam versus beta-lactam-aminoglycoside combination therapy in cancer patients with neutropenia                                                       | Beta-lactam vs beta-lactam-aminoglycoside combination therapy         | Any adverse event                          | .8635       | .4907           | 1.52            | .7305     | 1.52        | .6334          | .6334          | .8424         | .846      | .4896         | 1.462         |        |        |        |        |        |
| CD003558      | Inhaled corticosteroids versus sodium cromoglycate in children and adults with asthma                                                                       | Inhaled corticosteroids vs cromolyn                                   | Total adverse effects                      | .8928       | .2342           | 3.404           | 1.044     | 3.404       | .3025          | .3025          | 3.604         | 1.169     | .7049         | 1.94          |        |        |        |        |        |
| CD001385      | Long-acting beta2-agonists for chronic asthma in adults and children where background therapy contains varied or no inhaled corticosteroid                  | LAB2A vs placebo                                                      | Total adverse events                       | .9107       | .6767           | 1.226           | 1.136     | 1.226       | .9526          | .9526          | 1.354         | 1.247     | .9815         | 1.584         |        |        |        |        |        |
| CD005535      | Long-acting beta2-agonists versus placebo in addition to inhaled corticosteroids                                                                            | Long-acting beta2 vs placebo (both groups receiving similar dose ICS) | Total adverse events                       | .9124       | .7512           | 1.108           | .9944     | 1.108       | .8955          | .8955          | 1.104         | 1.09      | .9251         | 1.284         |        |        |        |        |        |
| CD005533      | Combination of inhaled long-acting beta2-agonists and inhaled steroids versus higher dose of inhaled steroids in children and adults with persistent asthma | LABA + ICS vs higher dose ICS                                         | Total adverse events                       | .9388       | .6855           | 1.286           | .9305     | 1.286       | .8453          | .8453          | 1.027         | .9911     | .7352         | 1.356         |        |        |        |        |        |



SUPPLEMENTAL TABLE 4 Continued

| Review        | Title                                                                                                                                                     | Comparison                                                                         | Severe adverse events                                                                        | sROR       |                | LCI_sROR       |                  | UCI_sROR             |                      | i2             |                    | LCI OR peds        | UCI OR peds |
|---------------|-----------------------------------------------------------------------------------------------------------------------------------------------------------|------------------------------------------------------------------------------------|----------------------------------------------------------------------------------------------|------------|----------------|----------------|------------------|----------------------|----------------------|----------------|--------------------|--------------------|-------------|
|               |                                                                                                                                                           |                                                                                    |                                                                                              | ROR        | LCI ROR        | LCI ROR        | UCI ROR          | OR adults            | OR adults            | OR peds        | OR peds            |                    |             |
| CD000133      | Addition of anti-leukotriene agents to inhaled corticosteroids for chronic asthma                                                                         | Leukotriene receptor antagonists + ICS vs same dose of ICS in symptomatic patients | Overall adverse events                                                                       | 1.072      | .7054          | 1.63           | 2.15             | .9373                | .7326                | 1.199          | .8741              | .6231              | 1.226       |
| CD0004386     | Antibiotic prophylaxis for bacterial infections in afebrile neutropenic patients following chemotherapy                                                   | Quinolone vs TMP-SMZ                                                               | Side effects (Quinolones vs TMP-SMZ)                                                         | 1.224      | .1943          | 7.713          | .6122            | .8427                | .5                   | .8427          | .0816              | 3.063              |             |
| CD0002242     | Antibiotic treatment for travellers' diarrhoea                                                                                                            | Antibiotic vs placebo                                                              | Side effects (any)                                                                           | 1.304      | .5115          | 3.323          | 2.535            | 1.367                | 1.944                | 4.701          | 1.944              | 9628               | 3.927       |
| CD000296      | Budesonide for induction of remission in Crohn's disease                                                                                                  | Budesonide vs conventional steroids                                                | Corticosteroid related adverse events                                                        | 1.669      | .6064          | 4.596          | .4121            | .2959                | .5738                | .2468          | .0948              | .6428              |             |
| CD0002314     | Anti-leukotriene agents compared to inhaled corticosteroids in the management of recurrent and/or chronic asthma in adults and children                   | Anti-leukotriene vs inhaled glucocorticoids                                        | Overall adverse events                                                                       | 1.826      | .704           | 4.736          | .9807            | .8663                | 1.11                 | .5371          | .2088              | 1.382              |             |
| CD0003901     | Regular treatment with long acting beta agonists versus daily regular treatment with short acting beta agonists in adults and children with stable asthma | Regular treatment with LAB2A vs daily regular treatment with SAB2A                 | Adverse events (palpitations, headache, tremor and cramps)                                   | 2.338      | .4757          | 11.49          | 1.214            | .3571                | 4.127                | .5192          | .1874              | 1.438              |             |
| CD001954      | Azithromycin for acute lower respiratory tract infections                                                                                                 | Azithromycin vs amoxicillin or amoxicillin-clavulanate                             | Adverse events                                                                               | 2.499      | 1.425          | 4.382          | .7474            | .5892                | .948                 | .2991          | .1798              | .4974              |             |
| CD000247      | Antibiotics for the common cold and acute purulent rhinitis                                                                                               | Antibiotic vs placebo                                                              | Adverse events                                                                               | 2.67       | 1.19           | 5.991          | 2.417            | 1.676                | 3.485                | .9052          | .4403              | 1.861              |             |
| CD0003723     | Anticonvulsant therapy for status epilepticus                                                                                                             | Lorazepam IV vs diazepam IV                                                        | Adverse events                                                                               |            |                | .7606          | .2696            | 2.145                |                      |                |                    |                    |             |
| <b>Review</b> | <b>Title</b>                                                                                                                                              | <b>Comparison</b>                                                                  | <b>Organ-System specific adverse events</b>                                                  | <b>ROR</b> | <b>LCI ROR</b> | <b>UCI ROR</b> | <b>OR adults</b> | <b>LCI OR adults</b> | <b>UCI OR adults</b> | <b>OR peds</b> | <b>LCI OR peds</b> | <b>UCI OR peds</b> |             |
| CD001186      | Allergen immunotherapy for asthma                                                                                                                         | Allergen immunotherapy vs placebo                                                  | Systemic reactions (anaphylaxis, asthma, rhinitis or urticaria)                              | .7143      | .2599          | 1.963          | 1.735            | 1.109                | 2.714                | 2.429          | .981               | 6.016              |             |
| CD001186      | Allergen immunotherapy for asthma                                                                                                                         | Allergen immunotherapy vs Untreated control                                        | Systemic reactions (anaphylaxis, asthma, rhinitis or urticaria, or any combination of these) |            |                | 15.63          | .7692            | 317.7                |                      |                |                    |                    |             |
| CD001186      | Allergen immunotherapy for asthma                                                                                                                         | Allergen immunotherapy vs placebo                                                  | Local reactions (large or delayed wheals at injection site)                                  | 1.69       | .4749          | 6.013          | 1.836            | .7671                | 4.395                | 1.087          | .4324              | 2.731              |             |

| Review        | Title                                                                                                                                                       | Comparison                                                            | Severe adverse events                     | sROR        |                 | LCI_sROR        |           | UCI_sROR  |           | i2        | OR        |               | LCI OR        |               | UCI OR        |           |               |               |               |       |
|---------------|-------------------------------------------------------------------------------------------------------------------------------------------------------------|-----------------------------------------------------------------------|-------------------------------------------|-------------|-----------------|-----------------|-----------|-----------|-----------|-----------|-----------|---------------|---------------|---------------|---------------|-----------|---------------|---------------|---------------|-------|
|               |                                                                                                                                                             |                                                                       |                                           | ROR         | LCI ROR         | LCI ROR         | UCI ROR   | UCI ROR   | OR        |           | LCI OR    | LCI OR        | UCI OR        | UCI OR        | OR            | LCI OR    | LCI OR        | UCI OR        |               |       |
| CD003039      | Colony stimulating factors for chemotherapy induced febrile neutropenia                                                                                     | Colony stimulating factor + antibiotics vs antibiotics alone          | Bone and joint pain OR flu like symptoms  | .0893       | .0015           | .0015           | 5.264     | 5.264     | 1.000     | 0%        | 1.25      | 0.73          | 2.15          | 0%            | 16.34         | 11.2      | .5749         | 218.3         |               |       |
| CD003992      | Oral versus intravenous antibiotic treatment for febrile neutropenia in cancer patients                                                                     | Oral vs intravenous antibiotic therapy                                | GI adverse events                         | 1.063       | .0822           | .0822           | 13.76     | 13.76     | 3.07      | 3.07      | 1.063     | .0822         | 13.76         | 3.07          | 29.91         | 2.888     | .8947         | 9.32          |               |       |
| CD005535      | Long-acting beta2-agonists versus placebo in addition to inhaled corticosteroids                                                                            | Long-acting beta2 vs placebo (both groups receiving similar dose ICS) | Adverse cardiovascular events             | 3.47        | .1137           | .1137           | 105.9     | 105.9     | 1.061     | 1.061     | 3.47      | .1137         | 105.9         | 1.061         | 3.331         | .3058     | .0122         | 7.663         |               |       |
| <b>Review</b> | <b>Title</b>                                                                                                                                                | <b>Comparison</b>                                                     | <b>Specific adverse signs or symptoms</b> | <b>sROR</b> | <b>LCI_sROR</b> | <b>UCI_sROR</b> | <b>i2</b> | <b>i2</b> | <b>OR</b> | <b>OR</b> | <b>OR</b> | <b>LCI OR</b> | <b>LCI OR</b> | <b>UCI OR</b> | <b>UCI OR</b> | <b>OR</b> | <b>LCI OR</b> | <b>LCI OR</b> | <b>UCI OR</b> |       |
| CD002028      | Oxcarbazepine add-on for drug-resistant partial epilepsy                                                                                                    | Oxcarbazepine in add-on vs placebo                                    | Headache                                  | .82         | .70             | .96             | 0%        | 0%        | .82       | .70       | .96       | 0%            | 0%            | 1.799         | 2.157         | 1.213     | .7928         | 3.836         | 2.117         |       |
| CD003559      | Anti-IgE for chronic asthma in adults and children (inhaled or oral steroid users)                                                                          | Subcutaneous Omalizumab + steroid vs placebo + steroid                | Headache                                  | .5592       | .2774           | 1.127           | 1.206     | 1.206     | 1.206     | 1.206     | .5592     | .2774         | 1.127         | 1.206         | 1.799         | 2.157     | 1.213         | .7928         | 3.836         | 2.117 |
| CD005533      | Combination of inhaled long-acting beta2-agonists and inhaled steroids versus higher dose of inhaled steroids in children and adults with persistent asthma | LABA + ICS vs higher dose ICS                                         | Headache                                  | .658        | .4229           | 1.024           | .9736     | .9736     | .9736     | .9736     | .658      | .4229         | 1.024         | .9736         | 1.135         | 1.48      | .9774         | 2.24          | 2.24          | 2.24  |
| CD005535      | Long-acting beta2-agonists versus placebo in addition to inhaled corticosteroids                                                                            | Long-acting beta2 vs placebo (both groups receiving similar dose ICS) | Headache                                  | .8021       | .5806           | 1.108           | .8877     | .8877     | .8877     | .8877     | .8021     | .5806         | 1.108         | .8877         | 1.104         | 1.107     | .8716         | 1.405         | 1.405         | 1.405 |
| CD004125      | Drugs for preventing postoperative nausea and vomiting                                                                                                      | Droperidol vs placebo                                                 | Headache                                  | .8159       | .1876           | 3.549           | .8159     | .8159     | .8159     | .8159     | .8159     | .1876         | 3.549         | .8159         | 1.055         | 1.000     | .2551         | 4.253         | 4.253         | 4.253 |
| CD004125      | Drugs for preventing postoperative nausea and vomiting                                                                                                      | Ondansetron vs placebo                                                | Headache                                  | .8686       | .4731           | 1.594           | 1.294     | 1.294     | 1.294     | 1.294     | .8686     | .4731         | 1.594         | 1.294         | 1.553         | 1.489     | .8345         | 2.658         | 2.658         | 2.658 |
| CD001385      | Long-acting beta2-agonists for chronic asthma in adults and children where background therapy contains varied or no inhaled corticosteroid                  | LAB2A vs placebo                                                      | Adverse events - headache                 | .8747       | .5526           | 1.385           | 1.221     | 1.221     | 1.221     | 1.221     | .8747     | .5526         | 1.385         | 1.221         | 1.559         | 1.396     | .946          | 2.059         | 2.059         | 2.059 |
| CD006198      | Vaccines for preventing malaria (pre-erythrocytic)                                                                                                          | RTS,S vaccine vs control                                              | Headache                                  | .892        | .408            | 1.95            | 1.669     | 1.669     | 1.669     | 1.669     | .892      | .408          | 1.95          | 1.669         | 2.227         | 1.871     | .9044         | 3.872         | 3.872         | 3.872 |
| CD001909      | Lamotrigine add-on for drug-resistant partial epilepsy                                                                                                      | Add-on lamotrigine vs placebo                                         | Headache                                  | .8988       | .3965           | 2.028           | 1.157     | 1.157     | 1.157     | 1.157     | .8988     | .3965         | 2.028         | 1.157         | 1.596         | 1.29      | .6095         | 2.73          | 2.73          | 2.73  |

SUPPLEMENTAL TABLE 4 Continued

| Review    | Title                                                                                                                                                     | Comparison                                                                         | Severe adverse events                     | sROR        |                 | UCI_sROR        |           | i2    |        | OR     |        | UCI OR |       | pedis |       |
|-----------|-----------------------------------------------------------------------------------------------------------------------------------------------------------|------------------------------------------------------------------------------------|-------------------------------------------|-------------|-----------------|-----------------|-----------|-------|--------|--------|--------|--------|-------|-------|-------|
|           |                                                                                                                                                           |                                                                                    |                                           | ROR         | LCI             | ROR             | LCI       | OR    | adults | OR     | adults | OR     | pedis | OR    | pedis |
| CD0003901 | Regular treatment with long acting beta agonists versus daily regular treatment with short acting beta agonists in adults and children with stable asthma | Regular treatment with LAB2A vs daily regular treatment with SAB2A                 | Headache                                  | .9306       | .5525           | 1.567           |           | 1.224 | 0%     | 1.315  | 1.618  | .9259  | 1.618 | .8466 | 2.043 |
| CD001415  | Gabapentin add-on for drug-resistant partial epilepsy                                                                                                     | Gabapentin vs placebo                                                              | Headache                                  | .9505       | .2769           | 3.263           |           | .7571 |        | .7965  | 1.35   | .4245  | 1.35  | .268  | 2.367 |
| CD002314  | Anti-leukotriene agents compared to inhaled corticosteroids in the management of recurrent and/or chronic asthma in adults and children                   | Anti-leukotriene vs inhaled glucocorticoids                                        | Headache                                  | 1.019       | .3418           | 3.036           |           | .9078 |        | .8912  | 1.109  | .7434  | 1.109 | .3046 | 2.608 |
| CD0003133 | Addition of anti-leukotriene agents to inhaled corticosteroids for chronic asthma                                                                         | Leukotriene receptor antagonists + ICS vs same dose of ICS in symptomatic patients | Headache                                  | 1.241       | .6213           | 2.48            |           | 1.267 |        | 1.021  | 1.757  | .9138  | 1.757 | .5546 | 1.879 |
| CD002178  | Early emergency department treatment of acute asthma with systemic corticosteroids                                                                        | Any steroid (po, IM, IV, inhaled) vs placebo                                       | Headache                                  | 4.323       | .1161           | 160.9           |           | 1.363 |        | .3153  | 6.437  | .2886  | 6.437 | .012  | 8.269 |
| CD004529  | Atovaquone-proguanil for treating uncomplicated malaria                                                                                                   | Atovaquone-proguanil vs amodiaquine                                                | Headache                                  | 8.654       | .7469           | 100.3           |           | 4.19  |        | .4842  | 40.62  | .4323  | 40.62 | .1934 | 1.212 |
|           | <b>Review Title</b>                                                                                                                                       | <b>Comparison</b>                                                                  | <b>Specific adverse signs or symptoms</b> | <b>sROR</b> | <b>LCI_sROR</b> | <b>UCI_sROR</b> | <b>i2</b> |       |        |        |        |        |       |       |       |
|           |                                                                                                                                                           |                                                                                    | Drowsiness                                | 1.02        | .58             | 1.79            | 33.9%     |       |        |        |        |        |       |       |       |
| CD000059  | Clozapine versus typical neuroleptic medication for schizophrenia                                                                                         | Clozapine vs typical antipsychotics                                                | Drowsiness                                | .0734       | .0062           | .8683           |           | 1.761 |        | 24.000 | 2.317  | 1.339  | 2.317 | 2.06  | 279.6 |
| CD004052  | Valproate for acute mood episodes in bipolar disorder                                                                                                     | Valproate vs lithium                                                               | Sedation                                  | .1184       | .0047           | 2.978           |           | .9617 |        | 8.12   | 2.674  | .346   | 2.674 | .3814 | 172.9 |
| CD004125  | Drugs for preventing postoperative nausea and vomiting                                                                                                    | Droperidol vs no treatment                                                         | Drowsiness or sedation                    | .6523       | .0694           | 6.13            |           | 3.131 |        | 4.8    | 9.406  | 1.042  | 9.406 | .6817 | 33.8  |
| CD002028  | Oxcarbazepine add-on for drug-resistant partial epilepsy                                                                                                  | Oxcarbazepine in add-on vs placebo                                                 | Somnolence                                | .8299       | .3762           | 1.831           |           | 2.729 |        | 3.289  | 4.523  | 1.647  | 4.523 | 1.789 | 6.046 |
| CD001909  | Lamotrigine add-on for drug-resistant partial epilepsy                                                                                                    | Add-on lamotrigine vs placebo                                                      | Somnolence                                | 1.086       | .4829           | 2.443           |           | 1.624 |        | 1.495  | 2.498  | 1.056  | 2.498 | .7525 | 2.971 |
| CD001415  | Gabapentin add-on for drug-resistant partial epilepsy                                                                                                     | Gabapentin vs placebo                                                              | Somnolence                                | 1.161       | .3732           | 3.612           |           | 2.166 |        | 1.865  | 3.375  | 1.389  | 3.375 | .6563 | 5.302 |
| CD004125  | Drugs for preventing postoperative nausea and vomiting                                                                                                    | Droperidol vs placebo                                                              | Drowsiness or sedation                    | 1.657       | .312            | 8.804           |           | 1.657 |        | 1.000  | 2.123  | 1.294  | 2.123 | .1917 | 5.215 |

| Review   | Title                                                 | Comparison            | Severe adverse events |                 |                 |                  |                  |                      |                      |                |                    |                    |                |                    |                    |                |                    |                    |                |
|----------|-------------------------------------------------------|-----------------------|-----------------------|-----------------|-----------------|------------------|------------------|----------------------|----------------------|----------------|--------------------|--------------------|----------------|--------------------|--------------------|----------------|--------------------|--------------------|----------------|
|          |                                                       |                       | sROR                  | LCI_sROR        | UCI_sROR        | i2               | OR               | UCI OR               |                      |                |                    |                    |                |                    |                    |                |                    |                    |                |
| CD001417 | Topiramate add-on for drug-resistant partial epilepsy | Topiramate vs placebo | 1.25                  | 0.73            | 2.15            | 0%               |                  |                      |                      |                |                    |                    |                |                    |                    |                |                    |                    |                |
|          |                                                       |                       | <b>ROR</b>            | <b>LCI ROR</b>  | <b>UCI ROR</b>  | <b>OR adults</b> | <b>OR adults</b> | <b>LCI OR adults</b> | <b>UCI OR adults</b> | <b>OR peds</b> | <b>LCI OR peds</b> | <b>UCI OR peds</b> | <b>OR peds</b> | <b>LCI OR peds</b> | <b>UCI OR peds</b> | <b>OR peds</b> | <b>LCI OR peds</b> | <b>UCI OR peds</b> | <b>OR peds</b> |
|          |                                                       |                       | 2.761                 | 1.01            | 7.556           | 2.812            | 0.000            | 1.921                | 4.117                | 1.019          | .4012              | 2.586              |                |                    |                    |                |                    |                    |                |
|          |                                                       |                       | <b>sROR</b>           | <b>LCI_sROR</b> | <b>UCI_sROR</b> | <b>i2</b>        |                  |                      |                      |                |                    |                    |                |                    |                    |                |                    |                    |                |
|          |                                                       |                       | .69                   | .40             | 1.21            | 0.000            |                  |                      |                      |                |                    |                    |                |                    |                    |                |                    |                    |                |
|          |                                                       |                       | <b>ROR</b>            | <b>LCI ROR</b>  | <b>UCI ROR</b>  | <b>OR adults</b> | <b>OR adults</b> | <b>LCI OR adults</b> | <b>UCI OR adults</b> | <b>OR peds</b> | <b>LCI OR peds</b> | <b>UCI OR peds</b> | <b>OR peds</b> | <b>LCI OR peds</b> | <b>UCI OR peds</b> | <b>OR peds</b> | <b>LCI OR peds</b> | <b>UCI OR peds</b> | <b>OR peds</b> |
|          |                                                       |                       | .2928                 | .0605           | 1.417           | 1.832            | 1.832            | 1.271                | 2.642                | 6.259          | 1.35               | 29.02              |                |                    |                    |                |                    |                    |                |
|          |                                                       |                       | .4623                 | .0926           | 2.309           | 1.462            | .8615            | 2.48                 | 3.162                | .6921          | 14.44              |                    |                |                    |                    |                |                    |                    |                |
|          |                                                       |                       | .623                  | .202            | 1.921           | .7557            | .4047            | 1.411                | 1.213                | .4751          | 3.097              |                    |                |                    |                    |                |                    |                    |                |
|          |                                                       |                       | .6699                 | .0259           | 17.31           | 1.011            | .6513            | 1.569                | 1.509                | .0602          | 37.86              |                    |                |                    |                    |                |                    |                    |                |
|          |                                                       |                       | <b>sROR</b>           | <b>LCI_sROR</b> | <b>UCI_sROR</b> | <b>i2</b>        |                  |                      |                      |                |                    |                    |                |                    |                    |                |                    |                    |                |
|          |                                                       |                       | .6794                 | .2398           | 1.925           | 3.289            | 1.834            | 5.897                | 4.841                | 2.044          | 11.47              |                    |                |                    |                    |                |                    |                    |                |
|          |                                                       |                       | .7485                 | .1001           | 5.594           | .6861            | .2781            | 1.693                | 9.167                | .1519          | 5.531              |                    |                |                    |                    |                |                    |                    |                |
|          |                                                       |                       | 1.968                 | .3135           | 12.35           | .7585            | .3374            | 1.705                | .3855                | .0741          | 2.004              |                    |                |                    |                    |                |                    |                    |                |
|          |                                                       |                       | 10.27                 | .4713           | 224             | 2.043            | .1791            | 23.29                | .1988                | .03            | 1.317              |                    |                |                    |                    |                |                    |                    |                |
|          |                                                       |                       | <b>sROR</b>           | <b>LCI_sROR</b> | <b>UCI_sROR</b> | <b>i2</b>        |                  |                      |                      |                |                    |                    |                |                    |                    |                |                    |                    |                |
|          |                                                       |                       | .81                   | .48             | 1.35            | 0.000            |                  |                      |                      |                |                    |                    |                |                    |                    |                |                    |                    |                |
|          |                                                       |                       | <b>ROR</b>            | <b>LCI ROR</b>  | <b>UCI ROR</b>  | <b>OR adults</b> | <b>OR adults</b> | <b>LCI OR adults</b> | <b>UCI OR adults</b> | <b>OR peds</b> | <b>LCI OR peds</b> | <b>UCI OR peds</b> | <b>OR peds</b> | <b>LCI OR peds</b> | <b>UCI OR peds</b> | <b>OR peds</b> | <b>LCI OR peds</b> | <b>UCI OR peds</b> | <b>OR peds</b> |
|          |                                                       |                       | .2121                 | .0056           | 7.964           | .0514            | .0029            | .9112                | .2424                | .0266          | 2.208              |                    |                |                    |                    |                |                    |                    |                |
|          |                                                       |                       | .393                  | .1268           | 1.218           | .7867            | .4998            | 1.238                | 2.002                | .7101          | 5.643              |                    |                |                    |                    |                |                    |                    |                |
|          |                                                       |                       | .8507                 | .2769           | 2.613           | 2.664            | 1.693            | 4.194                | 3.132                | 1.122          | 8.742              |                    |                |                    |                    |                |                    |                    |                |
|          |                                                       |                       | <b>sROR</b>           | <b>LCI_sROR</b> | <b>UCI_sROR</b> | <b>i2</b>        |                  |                      |                      |                |                    |                    |                |                    |                    |                |                    |                    |                |
|          |                                                       |                       | .81                   | .48             | 1.35            | 0.000            |                  |                      |                      |                |                    |                    |                |                    |                    |                |                    |                    |                |
|          |                                                       |                       | <b>ROR</b>            | <b>LCI ROR</b>  | <b>UCI ROR</b>  | <b>OR adults</b> | <b>OR adults</b> | <b>LCI OR adults</b> | <b>UCI OR adults</b> | <b>OR peds</b> | <b>LCI OR peds</b> | <b>UCI OR peds</b> | <b>OR peds</b> | <b>LCI OR peds</b> | <b>UCI OR peds</b> | <b>OR peds</b> | <b>LCI OR peds</b> | <b>UCI OR peds</b> | <b>OR peds</b> |
|          |                                                       |                       | .2121                 | .0056           | 7.964           | .0514            | .0029            | .9112                | .2424                | .0266          | 2.208              |                    |                |                    |                    |                |                    |                    |                |
|          |                                                       |                       | .393                  | .1268           | 1.218           | .7867            | .4998            | 1.238                | 2.002                | .7101          | 5.643              |                    |                |                    |                    |                |                    |                    |                |
|          |                                                       |                       | .8507                 | .2769           | 2.613           | 2.664            | 1.693            | 4.194                | 3.132                | 1.122          | 8.742              |                    |                |                    |                    |                |                    |                    |                |
|          |                                                       |                       | <b>sROR</b>           | <b>LCI_sROR</b> | <b>UCI_sROR</b> | <b>i2</b>        |                  |                      |                      |                |                    |                    |                |                    |                    |                |                    |                    |                |
|          |                                                       |                       | .81                   | .48             | 1.35            | 0.000            |                  |                      |                      |                |                    |                    |                |                    |                    |                |                    |                    |                |
|          |                                                       |                       | <b>ROR</b>            | <b>LCI ROR</b>  | <b>UCI ROR</b>  | <b>OR adults</b> | <b>OR adults</b> | <b>LCI OR adults</b> | <b>UCI OR adults</b> | <b>OR peds</b> | <b>LCI OR peds</b> | <b>UCI OR peds</b> | <b>OR peds</b> | <b>LCI OR peds</b> | <b>UCI OR peds</b> | <b>OR peds</b> | <b>LCI OR peds</b> | <b>UCI OR peds</b> | <b>OR peds</b> |
|          |                                                       |                       | .2121                 | .0056           | 7.964           | .0514            | .0029            | .9112                | .2424                | .0266          | 2.208              |                    |                |                    |                    |                |                    |                    |                |
|          |                                                       |                       | .393                  | .1268           | 1.218           | .7867            | .4998            | 1.238                | 2.002                | .7101          | 5.643              |                    |                |                    |                    |                |                    |                    |                |
|          |                                                       |                       | .8507                 | .2769           | 2.613           | 2.664            | 1.693            | 4.194                | 3.132                | 1.122          | 8.742              |                    |                |                    |                    |                |                    |                    |                |
|          |                                                       |                       | <b>sROR</b>           | <b>LCI_sROR</b> | <b>UCI_sROR</b> | <b>i2</b>        |                  |                      |                      |                |                    |                    |                |                    |                    |                |                    |                    |                |
|          |                                                       |                       | .81                   | .48             | 1.35            | 0.000            |                  |                      |                      |                |                    |                    |                |                    |                    |                |                    |                    |                |
|          |                                                       |                       | <b>ROR</b>            | <b>LCI ROR</b>  | <b>UCI ROR</b>  | <b>OR adults</b> | <b>OR adults</b> | <b>LCI OR adults</b> | <b>UCI OR adults</b> | <b>OR peds</b> | <b>LCI OR peds</b> | <b>UCI OR peds</b> | <b>OR peds</b> | <b>LCI OR peds</b> | <b>UCI OR peds</b> | <b>OR peds</b> | <b>LCI OR peds</b> | <b>UCI OR peds</b> | <b>OR peds</b> |
|          |                                                       |                       | .2121                 | .0056           | 7.964           | .0514            | .0029            | .9112                | .2424                | .0266          | 2.208              |                    |                |                    |                    |                |                    |                    |                |
|          |                                                       |                       | .393                  | .1268           | 1.218           | .7867            | .4998            | 1.238                | 2.002                | .7101          | 5.643              |                    |                |                    |                    |                |                    |                    |                |
|          |                                                       |                       | .8507                 | .2769           | 2.613           | 2.664            | 1.693            | 4.194                | 3.132                | 1.122          | 8.742              |                    |                |                    |                    |                |                    |                    |                |
|          |                                                       |                       | <b>sROR</b>           | <b>LCI_sROR</b> | <b>UCI_sROR</b> | <b>i2</b>        |                  |                      |                      |                |                    |                    |                |                    |                    |                |                    |                    |                |
|          |                                                       |                       | .81                   | .48             | 1.35            | 0.000            |                  |                      |                      |                |                    |                    |                |                    |                    |                |                    |                    |                |
|          |                                                       |                       | <b>ROR</b>            | <b>LCI ROR</b>  | <b>UCI ROR</b>  | <b>OR adults</b> | <b>OR adults</b> | <b>LCI OR adults</b> | <b>UCI OR adults</b> | <b>OR peds</b> | <b>LCI OR peds</b> | <b>UCI OR peds</b> | <b>OR peds</b> | <b>LCI OR peds</b> | <b>UCI OR peds</b> | <b>OR peds</b> | <b>LCI OR peds</b> | <b>UCI OR peds</b> | <b>OR peds</b> |
|          |                                                       |                       | .2121                 | .0056           | 7.964           | .0514            | .0029            | .9112                | .2424                | .0266          | 2.208              |                    |                |                    |                    |                |                    |                    |                |
|          |                                                       |                       | .393                  | .1268           | 1.218           | .7867            | .4998            | 1.238                | 2.002                | .7101          | 5.643              |                    |                |                    |                    |                |                    |                    |                |
|          |                                                       |                       | .8507                 | .2769           | 2.613           | 2.664            | 1.693            | 4.194                | 3.132                | 1.122          | 8.742              |                    |                |                    |                    |                |                    |                    |                |
|          |                                                       |                       | <b>sROR</b>           | <b>LCI_sROR</b> | <b>UCI_sROR</b> | <b>i2</b>        |                  |                      |                      |                |                    |                    |                |                    |                    |                |                    |                    |                |
|          |                                                       |                       | .81                   | .48             | 1.35            | 0.000            |                  |                      |                      |                |                    |                    |                |                    |                    |                |                    |                    |                |
|          |                                                       |                       | <b>ROR</b>            | <b>LCI ROR</b>  | <b>UCI ROR</b>  | <b>OR adults</b> | <b>OR adults</b> | <b>LCI OR adults</b> | <b>UCI OR adults</b> | <b>OR peds</b> | <b>LCI OR peds</b> | <b>UCI OR peds</b> | <b>OR peds</b> | <b>LCI OR peds</b> | <b>UCI OR peds</b> | <b>OR peds</b> | <b>LCI OR peds</b> | <b>UCI OR peds</b> | <b>OR peds</b> |
|          |                                                       |                       | .2121                 | .0056           | 7.964           | .0514            | .0029            | .9112                | .2424                | .0266          | 2.208              |                    |                |                    |                    |                |                    |                    |                |
|          |                                                       |                       | .393                  | .1268           | 1.218           | .7867            | .4998            | 1.238                | 2.002                | .7101          | 5.643              |                    |                |                    |                    |                |                    |                    |                |
|          |                                                       |                       | .8507                 | .2769           | 2.613           | 2.664            | 1.693            | 4.194                | 3.132                | 1.122          | 8.742              |                    |                |                    |                    |                |                    |                    |                |
|          |                                                       |                       | <b>sROR</b>           | <b>LCI_sROR</b> | <b>UCI_sROR</b> | <b>i2</b>        |                  |                      |                      |                |                    |                    |                |                    |                    |                |                    |                    |                |
|          |                                                       |                       | .81                   | .48             | 1.35            | 0.000            |                  |                      |                      |                |                    |                    |                |                    |                    |                |                    |                    |                |
|          |                                                       |                       | <b>ROR</b>            | <b>LCI ROR</b>  | <b>UCI ROR</b>  | <b>OR adults</b> | <b>OR adults</b> | <b>LCI OR adults</b> | <b>UCI OR adults</b> | <b>OR peds</b> | <b>LCI OR peds</b> | <b>UCI OR peds</b> | <b>OR peds</b> | <b>LCI OR peds</b> | <b>UCI OR peds</b> | <b>OR peds</b> | <b>LCI OR peds</b> | <b>UCI OR peds</b> | <b>OR peds</b> |
|          |                                                       |                       | .2121                 | .0056           | 7.964           | .0514            | .0029            | .9112                | .2424                | .0266          | 2.208              |                    |                |                    |                    |                |                    |                    |                |
|          |                                                       |                       | .393                  | .1268           | 1.218           | .7867            | .4998            | 1.238                | 2.002                | .7101          | 5.643              |                    |                |                    |                    |                |                    |                    |                |
|          |                                                       |                       | .8507                 | .2769           | 2.613           | 2.664            | 1.693            | 4.194                | 3.132                | 1.122          | 8.742              |                    |                |                    |                    |                |                    |                    |                |

SUPPLEMENTAL TABLE 4 Continued

| Review        | Title                                                                                                  | Comparison                                                    | Severe adverse events                                                                                | sROR        |                 | LCI_sROR        |           | UCI_sROR |       | i2     |       | OR     |       | ped    |       | UCI OR |    | UCI OR |    |
|---------------|--------------------------------------------------------------------------------------------------------|---------------------------------------------------------------|------------------------------------------------------------------------------------------------------|-------------|-----------------|-----------------|-----------|----------|-------|--------|-------|--------|-------|--------|-------|--------|----|--------|----|
|               |                                                                                                        |                                                               |                                                                                                      | ROR         | LCI ROR         | UCI ROR         | UCI ROR   | adults   | OR    | adults | OR    | adults | OR    | ped    | OR    | ped    | OR | ped    | OR |
| CD006198      | Vaccines for preventing malaria (pre-erythrocytic)                                                     | RTS,S vaccine vs control                                      | Malaise                                                                                              | .8777       | .2825           | 2.727           | 2.15      | 1.864    | 1.35  | 2.573  | 2.123 | 2.123  | 2.123 | .7163  | 6.295 |        |    |        |    |
| CD001415      | Gabapentin add-on for drug-resistant partial epilepsy                                                  | Gabapentin vs placebo                                         | Fatigue                                                                                              | .9883       | .1576           | 6.198           | 2.166     | 2.166    | 1.128 | 4.158  | 2.191 | 2.191  | .3939 | 12.19  |       |        |    |        |    |
| CD002028      | Oxcarbazepine add-on for drug-resistant partial epilepsy                                               | Oxcarbazepine in add-on vs placebo                            | Fatigue                                                                                              | 1.337       | .4839           | 3.695           | 2.151     | 2.151    | 1.138 | 4.068  | 1.609 | 1.609  | .7288 | 3.552  |       |        |    |        |    |
| <b>Review</b> | <b>Title</b>                                                                                           | <b>Comparison</b>                                             | <b>Specific adverse signs or symptoms</b>                                                            | <b>sROR</b> | <b>LCI_sROR</b> | <b>UCI_sROR</b> | <b>i2</b> |          |       |        |       |        |       |        |       |        |    |        |    |
|               |                                                                                                        |                                                               | Dizziness                                                                                            | .69         | .37             | 1.29            | 0.000     |          |       |        |       |        |       |        |       |        |    |        |    |
| CD001909      | Lamotrigine add-on for drug-resistant partial epilepsy                                                 | Add-on lamotrigine vs placebo                                 | Dizziness                                                                                            | .4971       | .1714           | 1.442           | 2.603     | 2.603    | 1.921 | 3.527  | 5.236 | 5.236  | 1.888 | 14.530 |       |        |    |        |    |
| CD002028      | Oxcarbazepine add-on for drug-resistant partial epilepsy                                               | Oxcarbazepine in add-on vs placebo                            | Dizziness                                                                                            | .6964       | .2871           | 1.689           | 3.383     | 3.383    | 2.087 | 5.484  | 4.857 | 4.857  | 2.311 | 10.21  |       |        |    |        |    |
| CD004125      | Drugs for preventing postoperative nausea and vomiting                                                 | Tropisetron vs placebo                                        | Dizziness or vertigo                                                                                 | 1.086       | .0366           | 32.24           | .3548     | .3548    | .1246 | 1.01   | .3266 | .3266  | .013  | 8.216  |       |        |    |        |    |
| CD001415      | Gabapentin add-on for drug-resistant partial epilepsy                                                  | Gabapentin vs placebo                                         | Dizziness                                                                                            | 1.527       | .2339           | 9.964           | 2.487     | 2.487    | 1.502 | 4.118  | 1.629 | 1.629  | .2675 | 9.925  |       |        |    |        |    |
| CD004052      | Valproate for acute mood episodes in bipolar disorder                                                  | Valproate vs lithium                                          | Dizziness                                                                                            |             |                 |                 | 2.086     | 2.086    | .5429 | 8.017  |       |        |       |        |       |        |    |        |    |
| <b>Review</b> | <b>Title</b>                                                                                           | <b>Comparison</b>                                             | <b>Specific adverse signs or symptoms</b>                                                            | <b>sROR</b> | <b>LCI_sROR</b> | <b>UCI_sROR</b> | <b>i2</b> |          |       |        |       |        |       |        |       |        |    |        |    |
|               |                                                                                                        |                                                               | Infections                                                                                           | .62         | .27             | 1.43            | 0.000     |          |       |        |       |        |       |        |       |        |    |        |    |
| CD004386      | Antibiotic prophylaxis for bacterial infections in febrile neutropenic patients following chemotherapy | Drug vs placebo/no intervention                               | Infection resistant to drug taken, prophylaxis versus placebo or no intervention or other antibiotic | .4618       | .0657           | 3.245           | 1.466     | 1.466    | 1.019 | 2.109  | 3.174 | 3.174  | .4675 | 21.54  |       |        |    |        |    |
| CD004386      | Antibiotic prophylaxis for bacterial infections in febrile neutropenic patients following chemotherapy | Quinolone vs TMP-SMZ                                          | Infection resistant to drug taken, prophylaxis versus placebo or no intervention or other antibiotic | .5278       | .103            | 2.706           | .3519     | .3519    | .1603 | .7726  | .6667 | .6667  | .1591 | 2.793  |       |        |    |        |    |
| CD003038      | Beta-lactam versus beta-lactam-aminoglycoside combination therapy in cancer patients with neutropenia  | Beta-lactam vs beta-lactam-aminoglycoside combination therapy | Bacterial superinfections                                                                            | .7408       | .2464           | 2.227           | 1.075     | 1.075    | .8424 | 1.373  | 1.452 | 1.452  | .4962 | 4.246  |       |        |    |        |    |



SUPPLEMENTAL TABLE 4 Continued

| Review    | Title                                                                                                                                   | Comparison                                                                                         | Severe adverse events                                                               | sROR  |         | LCI_sROR |         | UCI_sROR |    | i2    | LCI OR |       | UCI OR |       |
|-----------|-----------------------------------------------------------------------------------------------------------------------------------------|----------------------------------------------------------------------------------------------------|-------------------------------------------------------------------------------------|-------|---------|----------|---------|----------|----|-------|--------|-------|--------|-------|
|           |                                                                                                                                         |                                                                                                    |                                                                                     | ROR   | LCI ROR | LCI ROR  | UCI ROR | adults   | OR |       | adults | OR    | adults | OR    |
| CD0004052 | Valproate for acute mood episodes in bipolar disorder                                                                                   | Valproate vs lithium                                                                               | Diarrhea                                                                            | 2.801 | .085    | 92.25    | 92.25   | .8131    | 0% | .2454 | 2.684  | .2903 | .0109  | 7.737 |
| CD0004529 | Atovaquone-proguanil for treating uncomplicated malaria                                                                                 | Atovaquone-proguanil vs amodiaquine                                                                | Diarrhea                                                                            | 1.591 | .5556   | 4.558    | 4.558   | 1.062    |    | .4762 | 2.367  | .6672 | .3375  | 1.319 |
| CD0002028 | Oxcarbazepine add-on for drug-resistant partial epilepsy                                                                                | Oxcarbazepine in add-on vs placebo                                                                 | Diplopia                                                                            | .3107 | .0363   | 2.661    | 2.661   | 7.954    |    | 3.814 | 16.59  | 25.6  | 3.403  | 192.6 |
| CD0004125 | Drugs for preventing postoperative nausea and vomiting                                                                                  | Hyoscine vs placebo                                                                                | Dry mouth                                                                           | .0847 | .0091   | .7863    | .7863   | 1.966    |    | 1.341 | 2.883  | 23.22 | 2.585  | 208.6 |
| CD0003133 | Addition of anti-leukotriene agents to inhaled corticosteroids for chronic asthma                                                       | Leukotriene receptor antagonists + ICS vs same dose of ICS in symptomatic patients                 | Elevated liver enzymes                                                              | .5563 | .0391   | 7.906    | 7.906   | 1.088    |    | .3553 | 3.334  | 1.956 | .1763  | 21.7  |
| CD0002314 | Anti-leukotriene agents compared to inhaled corticosteroids in the management of recurrent and/or chronic asthma in adults and children | Anti-leukotriene vs inhaled glucocorticoids                                                        | Elevated liver enzymes                                                              | 2.659 | .15     | 47.14    | 47.14   | 1.296    |    | .6714 | 2.5    | .4872 | .0297  | 8.002 |
| CD0006198 | Vaccines for preventing malaria (pre-erythrocytic)                                                                                      | RTS,S vaccine vs control                                                                           | Fever                                                                               | 2.818 | .9396   | 8.452    | 8.452   | 2.172    |    | .8178 | 5.767  | .7707 | .4663  | 1.274 |
| CD0000059 | Clozapine versus typical medication for schizophrenia                                                                                   | Clozapine vs typical antipsychotics                                                                | Fits                                                                                | .3887 | .0131   | 11.51    | 11.51   | 1.412    |    | .6989 | 2.851  | 3.632 | .1321  | 99.85 |
| CD0003038 | Beta-lactam versus beta-lactam-aminoglycoside combination therapy in cancer patients with neutropenia                                   | Beta-lactam vs beta-lactam-aminoglycoside combination therapy                                      | Fungal superinfections                                                              | 3.598 | .1644   | 78.73    | 78.73   | .6976    |    | .455  | 1.07   | .1939 | .0091  | 4.119 |
| CD0004386 | Antibiotic prophylaxis for bacterial infections in afebrile neutropenic patients following chemotherapy                                 | Drug vs placebo/no intervention                                                                    | Fungal infection, prophylaxis versus placebo or no intervention or other antibiotic | 2.925 | .2833   | 30.2     | 30.2    | 1.059    |    | .6701 | 1.674  | .3621 | .0367  | 3.573 |
| CD0004405 | Corticosteroids for acute bacterial meningitis                                                                                          | Corticosteroids vs placebo                                                                         | Gastrointestinal bleeding                                                           | 9.745 | .2903   | 3.271    | 3.271   | 1.501    |    | .6973 | 3.23   | 1.54  | .603   | 3.932 |
| CD0004405 | Corticosteroids for acute bacterial meningitis                                                                                          | Corticosteroids vs placebo                                                                         | Herpes zoster infection                                                             | 9.074 | .2526   | 3.26     | 3.26    | 1.125    |    | .8245 | 1.536  | 1.24  | .3587  | 4.288 |
| CD0003341 | High first dose quinine regimen for treating severe malaria                                                                             | Loading dose vs no loading dose                                                                    | Hypoglycemia                                                                        | 5.752 | .1842   | 179.6    | 179.6   | 3.214    |    | .2982 | 34.64  | .5588 | .0464  | 6.727 |
| CD0003754 | Reduced osmolality oral rehydration solution for treating cholera                                                                       | Reduced osmolality (glucose-based) oral rehydration solution vs standard oral rehydration solution | Biochemical hyponatremia (serum sodium < 130 mmol/L)                                | 1.101 | .3362   | 3.605    | 3.605   | 1.571    |    | .932  | 2.649  | 1.427 | .4921  | 4.14  |

**SUPPLEMENTAL TABLE 4** Continued

| Review   | Title                                                                                                                                                     | Comparison                                                            | Severe adverse events                       | sROR  |         | LCI_sROR |         | UCI_sROR |       | i2     |       | UCI OR |       | LCI OR |       | UCI OR |    | LCI OR |    |
|----------|-----------------------------------------------------------------------------------------------------------------------------------------------------------|-----------------------------------------------------------------------|---------------------------------------------|-------|---------|----------|---------|----------|-------|--------|-------|--------|-------|--------|-------|--------|----|--------|----|
|          |                                                                                                                                                           |                                                                       |                                             | ROR   | LCI ROR | UCI ROR  | UCI ROR | adults   | OR    | adults | OR    | adults | OR    | adults | OR    | adults | OR | adults | OR |
| CD006198 | Vaccines for preventing malaria (pre-erythrocytic)                                                                                                        | RTS,S vaccine vs control                                              | Injection site pain                         | 1.25  | 0.73    | 2        | 5.62    | 2.15     | 0%    | 5.309  | 3.862 | 7.298  | 1.64  | 1.045  | 2.573 |        |    |        |    |
| CD004529 | Atovaquone-proguanil for treating uncomplicated malaria                                                                                                   | Atovaquone-proguanil vs amodiaquine                                   | Insomnia                                    | 4.733 | .4858   |          | 46.11   |          | 1.27  | .252   | 6.4   | 2.683  | .0541 | 1.331  |       |        |    |        |    |
| CD000059 | Clozapine versus typical antipsychotics medication for schizophrenia                                                                                      | Clozapine vs typical antipsychotics                                   | Movement disorders                          | 1.525 | .0548   |          | 42.39   |          | .5083 | .3829  | .6747 | .3353  | .0121 | 9.156  |       |        |    |        |    |
| CD005535 | Long-acting beta2-agonists versus placebo in addition to inhaled corticosteroids                                                                          | Long-acting beta2 vs placebo (both groups receiving similar dose ICS) | Oral thrush                                 | .294  | .0354   |          | 2.442   |          | 1.134 | .3848  | 3.34  | 3.855  | .6245 | 23.8   |       |        |    |        |    |
| CD003274 | Budesonide versus placebo for chronic asthma in children and adults                                                                                       | BUD vs placebo (not on oral steroids)                                 | Oropharyngeal side effects                  | 2.831 | .7475   |          | 10.72   |          | 1.208 | .4258  | 3.43  | .4259  | .1866 | .9767  |       |        |    |        |    |
| CD003558 | Inhaled corticosteroids versus sodium cromoglycate in children and adults with asthma                                                                     | Inhaled corticosteroids vs cromolyn                                   | Oropharyngeal side effects                  | 1.64  | .1234   |          | 21.79   |          | 2.148 | .3635  | 12.69 | 1.31   | .1998 | 8.585  |       |        |    |        |    |
| CD003901 | Regular treatment with long acting beta agonists versus daily regular treatment with short acting beta agonists in adults and children with stable asthma | Regular treatment with LAB2A vs daily regular treatment with SAB2A    | Palpitations                                | 1.161 | .208    |          | 6.48    |          | 1.112 | .6064  | 2.041 | .9582  | .1917 | 4.788  |       |        |    |        |    |
| CD005535 | Long-acting beta2-agonists versus placebo in addition to inhaled corticosteroids                                                                          | Long-acting beta2 vs placebo (both groups receiving similar dose ICS) | Tachycardia-palpitation                     | 5.281 | .2664   |          | 104.7   |          | 2.539 | .8795  | 7.328 | .4808  | .0295 | 7.845  |       |        |    |        |    |
| CD001385 | Long-acting beta2-agonists for chronic asthma in adults and children where background therapy contains varied or no inhaled corticosteroid                | LAB2A vs placebo                                                      | Adverse events - pharyngitis                | 1.321 | .5321   |          | 3.28    |          | 1.727 | .8327  | 3.581 | 1.307  | .7593 | 2.25   |       |        |    |        |    |
| CD005161 | Cyclosporin versus tacrolimus for liver transplanted patients                                                                                             | Tacrolimus vs cyclosporin                                             | Post transplant lymphoproliferative disease | .0898 | .0045   |          | 1.799   |          | .4748 | .0599  | 3.767 | 5.287  | .6055 | 46.17  |       |        |    |        |    |
| CD004529 | Atovaquone-proguanil for treating uncomplicated malaria                                                                                                   | Atovaquone-proguanil vs amodiaquine                                   | Pruritis                                    | 2.524 | .0841   |          | 75.78   |          | 2.878 | .1115  | 74.24 | 1.14   | .4175 | 3.112  |       |        |    |        |    |
| CD004405 | Corticosteroids for acute bacterial meningitis                                                                                                            | Corticosteroids vs placebo                                            | Recurrent fever (adverse event)             | 1.316 | .6699   |          | 2.587   |          | 1.809 | .9717  | 3.369 | 1.374  | 1.055 | 1.79   |       |        |    |        |    |
| CD000059 | Clozapine versus typical antipsychotics medication for schizophrenia                                                                                      | Clozapine vs typical antipsychotics                                   | Salivation                                  | .4939 | .0626   |          | 3.899   |          | 5.186 | 3.832  | 7.02  | 10.5   | 1.36  | 81.06  |       |        |    |        |    |
| CD006198 | Vaccines for preventing malaria (pre-erythrocytic)                                                                                                        | RTS,S vaccine vs control                                              | Swelling                                    | .0317 | .0012   |          | .8036   |          | .3287 | .0134  | 8.093 | 10.38  | 6.689 | 16.16  |       |        |    |        |    |



SUPPLEMENTAL TABLE 4 Continued

| Review    | Title                                                                                                                                      | Comparison                                                                         | Severe adverse events                                             | sROR  |         | LCI_sROR |         | UCI_sROR  |           | i2            |               | OR            |               | pedS |      |
|-----------|--------------------------------------------------------------------------------------------------------------------------------------------|------------------------------------------------------------------------------------|-------------------------------------------------------------------|-------|---------|----------|---------|-----------|-----------|---------------|---------------|---------------|---------------|------|------|
|           |                                                                                                                                            |                                                                                    |                                                                   | ROR   | LCI ROR | LCI ROR  | UCI ROR | OR adults | OR adults | LCI OR adults | LCI OR adults | UCI OR adults | UCI OR adults | pedS | pedS |
| CD001417  | Topiramate add-on for drug-resistant partial epilepsy                                                                                      | Topiramate vs placebo                                                              | Thinking abnormally                                               | .8097 | .1413   | 4.64     | 7.203   | 3.353     | 15.48     | 8.897         | 1.852         | 42.73         |               |      |      |
| CD001385  | Long-acting beta2-agonists for chronic asthma in adults and children where background therapy contains varied or no inhaled corticosteroid | LAB2A vs placebo                                                                   | Adverse events - throat irritation                                | 1.279 | .4101   | 3.986    | 1.9     | 1.115     | 3.237     | 1.486         | .5443         | 4.058         |               |      |      |
| CD003407  | Erythropoietin or Darbepoetin for patients with cancer                                                                                     | Erythropoietin or darbepoetin vs placebo                                           | Thrombotic events                                                 | .5272 | .1022   | 2.719    | 1.611   | 1.265     | 2.052     | 3.057         | .6033         | 15.49         |               |      |      |
| CD002314  | Anti-leukotriene agents compared to inhaled corticosteroids in the management of recurrent and/or chronic asthma in adults and children    | Anti-leukotriene vs inhaled glucocorticoids                                        | Upper respiratory tract infections                                | .9648 | .6023   | 1.545    | 1.013   | .6835     | 1.503     | 1.05          | .8112         | 1.36          |               |      |      |
| CD001385  | Long-acting beta2-agonists for chronic asthma in adults and children where background therapy contains varied or no inhaled corticosteroid | LAB2A vs placebo                                                                   | Adverse events - upper respiratory tract infection                | .759  | .4717   | 1.221    | .9599   | .7043     | 1.308     | 1.265         | .8813         | 1.814         |               |      |      |
| CD003559  | Anti-IgE for chronic asthma in adults and children (inhaled or oral steroid users)                                                         | Subcutaneous Omalizumab + steroid vs placebo + steroid                             | Urticaria                                                         | .1983 | .0082   | 4.786    | .683    | 2.181     | 2.139     | 3.445         | .1764         | 67.29         |               |      |      |
| CD004529  | Atovaquone-proguanil for treating uncomplicated malaria                                                                                    | Atovaquone-proguanil vs amodiaquine                                                | Vomiting                                                          | 1.728 | .591    | 5.05     | 2.547   | 1.156     | 5.615     | 1.474         | .714          | 3.045         |               |      |      |
| CD000059  | Clozapine versus typical neuroleptic medication for schizophrenia                                                                          | Clozapine vs typical antipsychotics                                                | Weight gain                                                       | .3861 | .0601   | 2.481    | 1.576   | 1.11      | 2.239     | 4.083         | .6569         | 25.38         |               |      |      |
| Review    | title                                                                                                                                      | comparison                                                                         | Any discontinuations                                              | sROR  |         | LCI_sROR |         | UCI_sROR  |           | i2            |               | OR            |               | pedS |      |
|           |                                                                                                                                            |                                                                                    |                                                                   | ROR   | LCI ROR | LCI ROR  | UCI ROR | OR adults | OR adults | LCI OR adults | LCI OR adults | UCI OR adults | UCI OR adults | pedS | pedS |
| CD000059  | Clozapine versus typical neuroleptic medication for schizophrenia                                                                          | Clozapine vs typical antipsychotics                                                | Leaving the study early - acceptability of treatment (short term) | .1171 | .0089   | 1.383    | .502    | .4122     | .6112     | 4.286         | .3659         | 50.2          |               |      |      |
| CD002217  | Phenobarbitone versus phenytoin monotherapy for partial onset seizures and generalized onset tonic-clonic seizures                         | Phenobarbitone vs phenobarbitone                                                   | Time to treatment withdrawal                                      | .1815 | .0332   | .9923    | 1.538   | 1.042     | 2.268     | 8.471         | 1.621         | 44.26         |               |      |      |
| CD0003133 | Addition of anti-leukotriene agents to inhaled corticosteroids for chronic asthma                                                          | Leukotriene receptor antagonists + ICS vs same dose of ICS in symptomatic patients | Overall withdrawals                                               | .5867 | .1948   | 1.767    | .8734   | 6181      | 1.234     | 1.489         | .5226         | 4.241         |               |      |      |

**SUPPLEMENTAL TABLE 4** Continued

| Review   | Title                                                                                                                                                       | Comparison                                                            | Severe adverse events                                                | sROR  |         | LCI_sROR |          | UCI_sROR |       | i2     |        | OR    |       | UCI OR |    | pedts |        |
|----------|-------------------------------------------------------------------------------------------------------------------------------------------------------------|-----------------------------------------------------------------------|----------------------------------------------------------------------|-------|---------|----------|----------|----------|-------|--------|--------|-------|-------|--------|----|-------|--------|
|          |                                                                                                                                                             |                                                                       |                                                                      | ROR   | LCI ROR | UCI ROR  | UCI_sROR | adults   | OR    | adults | adults | OR    | pedts | adults | OR | pedts | adults |
| CD001769 | Phenytoin versus valproate monotherapy for partial onset seizures and generalized onset tonic-clonic seizures                                               | Valproate vs phenytoin                                                | Time to withdrawal of allocated treatment (all seizures)             | .6826 | .1981   | 2.352    | 2.15     | .5582    | 1.378 | .8177  | .3512  | 1.904 |       |        |    |       |        |
| CD003615 | Oxcarbazepine versus phenytoin monotherapy for epilepsy                                                                                                     | Oxcarbazepine vs phenytoin                                            | Discontinuation of allocated treatment                               | .8032 | .3081   | 2.094    | 2.973    | 1.635    | 2.973 | 2.036  | 9627   | 4.305 |       |        |    |       |        |
| CD005535 | Long-acting beta2-agonists versus placebo in addition to inhaled corticosteroids                                                                            | Long-acting beta2 vs placebo (both groups receiving similar dose ICS) | Total # withdrawals                                                  | .9651 | .7685   | 1.212    | .8566    | .7693    | .8566 | .7971  | .6521  | .9744 |       |        |    |       |        |
| CD004386 | Antibiotic prophylaxis for bacterial infections in febrile neutropenic patients following chemotherapy                                                      | Quinolone vs TMP-SMZ                                                  | Side effects requiring discontinuation were not described in details | .9754 | .1495   | 6.362    | .7886    | .4877    | .7886 | .5     | .0816  | 3.063 |       |        |    |       |        |
| CD001385 | Long-acting beta2-agonists for chronic asthma in adults and children where background therapy contains varied or no inhaled corticosteroid                  | LAB2A vs placebo                                                      | Withdrawals (all reasons)                                            | .9895 | .6869   | 1.426    | .9517    | .9009    | .9517 | 9.104  | .6346  | 1.306 |       |        |    |       |        |
| CD005533 | Combination of inhaled long-acting beta2-agonists and inhaled steroids versus higher dose of inhaled steroids in children and adults with persistent asthma | LABA + ICS vs higher dose ICS                                         | Total # withdrawals                                                  | 1.204 | .5478   | 2.648    | 1.009    | .9094    | 1.009 | .755   | .3458  | 1.646 |       |        |    |       |        |
| CD002314 | Anti-leukotriene agents compared to inhaled corticosteroids in the management of recurrent and/or chronic asthma in adults and children                     | Anti-leukotriene vs inhaled glucocorticoids                           | Overall withdrawals                                                  | 1.586 | .6208   | 4.053    | 1.571    | 1.353    | 1.571 | .8533  | .3379  | 2.154 |       |        |    |       |        |
| CD001911 | Carbamazepine versus phenytoin monotherapy for epilepsy                                                                                                     | Carbamazepine vs phenytoin                                            | Discontinuation of allocated treatment                               | 1.634 | .7468   | 3.577    | 1.712    | 1.151    | 1.712 | .7042  | .3584  | 1.384 |       |        |    |       |        |
| CD001415 | Gabapentin add-on for drug-resistant partial epilepsy                                                                                                       | Gabapentin vs placebo                                                 | Withdrawals                                                          | 1.716 | .6973   | 4.224    | 2.498    | 1.513    | 2.498 | .7653  | .4073  | 1.438 |       |        |    |       |        |
| CD001909 | Lamotrigine add-on for drug-resistant partial epilepsy                                                                                                      | Add-on lamotrigine vs placebo                                         | Withdrawal from treatment for any reason                             | 2.122 | .9818   | 4.585    | 1.881    | 1.314    | 1.881 | .6191  | .313   | 1.224 |       |        |    |       |        |
| CD005161 | Cyclosporin versus tacrolimus for liver transplanted patients                                                                                               | Tacrolimus vs cyclosporin                                             | Withdrawals from treatment for any reason                            | 2.165 | 1       | 4.294    | .9077    | .7098    | .9077 | .3279  | .173   | .6215 |       |        |    |       |        |
| CD001417 | Topiramate add-on for drug-resistant partial epilepsy                                                                                                       | Topiramate vs placebo                                                 | Withdrawals                                                          | 11.5  | .52     | 254.4    | 3.716    | 2.411    | 3.716 | .2096  | .0098  | 4.498 |       |        |    |       |        |

SUPPLEMENTAL TABLE 4 Continued

| Review    | Title                                                                                                                                      | Comparison                                                | Severe adverse events                                                                                                                              |        |        |        | i2     |        |        |        |        |        |        |        |        |        |        |        |        |        |      |     |
|-----------|--------------------------------------------------------------------------------------------------------------------------------------------|-----------------------------------------------------------|----------------------------------------------------------------------------------------------------------------------------------------------------|--------|--------|--------|--------|--------|--------|--------|--------|--------|--------|--------|--------|--------|--------|--------|--------|--------|------|-----|
|           |                                                                                                                                            |                                                           | sROR                                                                                                                                               | LCI    | sROR   | UCI    | sROR   | LCI    | sROR   | UCI    |        |        |        |        |        |        |        |        |        |        |      |     |
|           |                                                                                                                                            |                                                           | 1.25                                                                                                                                               | 0.73   | 2.15   | 0%     |        |        |        |        |        |        |        |        |        |        |        |        |        |        |      |     |
|           |                                                                                                                                            |                                                           | ROR                                                                                                                                                | LCI    | ROR    | UCI    | ROR    | LCI    | ROR    | UCI    | ROR    | LCI    | ROR    | UCI    | ROR    | LCI    | ROR    | UCI    | ROR    | UCI    |      |     |
|           |                                                                                                                                            |                                                           | adults                                                                                                                                             | adults | adults | adults | adults | adults | adults | adults | adults | adults | adults | adults | adults | adults | adults | adults | adults | adults |      |     |
|           |                                                                                                                                            |                                                           | ped                                                                                                                                                | ped    | ped    | ped    | ped    | ped    | ped    | ped    | ped    | ped    | ped    | ped    | ped    | ped    | ped    | ped    | ped    | ped    |      |     |
| Review    | Title                                                                                                                                      | Comparison                                                | sROR                                                                                                                                               | LCI    | sROR   | UCI    | sROR   | LCI    | sROR   | UCI    | sROR   | LCI    | sROR   | UCI    | sROR   | LCI    | sROR   | UCI    | sROR   | LCI    | sROR | UCI |
|           |                                                                                                                                            |                                                           | 88                                                                                                                                                 | 70     | 1.11   | 32.2%  |        |        |        |        |        |        |        |        |        |        |        |        |        |        |      |     |
| CD0002152 | Routine anticonvulsants for treating cerebral malaria                                                                                      | Phenobarbitone vs placebo or nothing                      | .2521                                                                                                                                              | .1012  | .6279  | .6019  | .3254  | 1.113  | 2.388  | 1      | 4.686  | 0.000  |        |        |        |        |        |        |        |        |      |     |
|           |                                                                                                                                            |                                                           | Analysis 1.1. Comparison 1 Phenobarbitone compared to placebo or nothing, Outcome 1 Death within 6 months in all trials.                           |        |        |        |        |        |        |        |        |        |        |        |        |        |        |        |        |        |      |     |
| CD0001319 | Colloid solutions for fluid resuscitation                                                                                                  | Hydroxyethyl starch vs albumin or plasma protein fraction | .3157                                                                                                                                              | .0521  | 1.913  | .9612  | .7504  | 1.231  | 3.045  | .5112  | 18.14  |        |        |        |        |        |        |        |        |        |      |     |
|           |                                                                                                                                            |                                                           | Analysis 1.1. Comparison 1 Albumin or PPF versus HES, Outcome 1 Death.                                                                             |        |        |        |        |        |        |        |        |        |        |        |        |        |        |        |        |        |      |     |
| CD0000196 | Corticosteroids for acute traumatic brain injury                                                                                           | Any steroid administered in any dose against no steroid   | .3203                                                                                                                                              | .0103  | 9.947  | 1.174  | 1.074  | 1.284  | 3.667  | .1182  | 113.7  |        |        |        |        |        |        |        |        |        |      |     |
|           |                                                                                                                                            |                                                           | Analysis 1.1. Comparison 1 Any steroid administered in any dose against no steroid, Outcome 1 Death at end of follow up period.                    |        |        |        |        |        |        |        |        |        |        |        |        |        |        |        |        |        |      |     |
| CD0001385 | Long-acting beta2-agonists for chronic asthma in adults and children where background therapy contains varied or no inhaled corticosteroid | LAB2A vs placebo                                          | .4351                                                                                                                                              | .0169  | 11.19  | 1.337  | .8475  | 2.109  | 3.073  | .1234  | 76.52  |        |        |        |        |        |        |        |        |        |      |     |
|           |                                                                                                                                            |                                                           | Analysis 2.5. Comparison 2 Studies with parallel group design: withdrawal & safety outcomes, Outcome 5 Death (all cause) - SMART all participants. |        |        |        |        |        |        |        |        |        |        |        |        |        |        |        |        |        |      |     |
| CD0000527 | Artemisinin derivatives for treating severe malaria                                                                                        | Any artemisinin drug vs quinine                           | .5162                                                                                                                                              | .342   | .779   | .4886  | .3639  | .6562  | .9467  | .7104  | 1.262  |        |        |        |        |        |        |        |        |        |      |     |
|           |                                                                                                                                            |                                                           | Analysis 1.1.5 Comparison 1 Artemisinin drug vs quinine, Outcome 1 Mortality (any artemisinin drug)                                                |        |        |        |        |        |        |        |        |        |        |        |        |        |        |        |        |        |      |     |
| CD0004386 | Antibiotic prophylaxis for bacterial infections in febrile neutropenic patients following chemotherapy                                     | Drug vs placebo/no intervention                           | .6084                                                                                                                                              | .1765  | 2.083  | .7108  | .5475  | .923   | 1.172  | .351   | 3.915  |        |        |        |        |        |        |        |        |        |      |     |
|           |                                                                                                                                            |                                                           | Analysis 1.1. Comparison 1 All-cause mortality, Outcome 1 drug vs placebo/no intervention.                                                         |        |        |        |        |        |        |        |        |        |        |        |        |        |        |        |        |        |      |     |
| CD0004405 | Corticosteroids for acute bacterial meningitis                                                                                             | Corticosteroids vs placebo                                | .9238                                                                                                                                              | .6292  | 1.356  | .924   | .7023  | 1.216  | 1.000  | .7645  | 1.309  |        |        |        |        |        |        |        |        |        |      |     |
|           |                                                                                                                                            |                                                           | Figure 9. Forest plot of comparison: 1 All patients, outcome: 1.1 Mortality.                                                                       |        |        |        |        |        |        |        |        |        |        |        |        |        |        |        |        |        |      |     |
| CD0001208 | Human albumin solution for resuscitation and volume expansion in critically ill                                                            | Supplemental albumin vs control                           | .931                                                                                                                                               | .7222  | 1.2    | 1.013  | .9062  | 1.133  | 1.088  | .8661  | 1.367  |        |        |        |        |        |        |        |        |        |      |     |
|           |                                                                                                                                            |                                                           | Analysis 1.1. Comparison 1 supplemental albumin, Outcome 1 deaths.                                                                                 |        |        |        |        |        |        |        |        |        |        |        |        |        |        |        |        |        |      |     |

**SUPPLEMENTAL TABLE 4** Continued

| Review    | Title                                                                                                                                   | Comparison                                                                           | Severe adverse events                                                                                                                                                                        | sROR  |         | LCI_sROR |         | UCI_sROR |        | i2    |        | OR    |        | LCI OR |        | UCI OR |        |
|-----------|-----------------------------------------------------------------------------------------------------------------------------------------|--------------------------------------------------------------------------------------|----------------------------------------------------------------------------------------------------------------------------------------------------------------------------------------------|-------|---------|----------|---------|----------|--------|-------|--------|-------|--------|--------|--------|--------|--------|
|           |                                                                                                                                         |                                                                                      |                                                                                                                                                                                              | ROR   | LCI ROR | UCI ROR  | LCI ROR | UCI ROR  | adults | OR    | adults | OR    | adults | OR     | adults | OR     | adults |
| CD004269  | Prophylactic platelet transfusion for haemorrhage after chemotherapy and stem cell transplantation                                      | Prophylactic platelet transfusion versus non prophylactic or therapeutic transfusion | Analysis 1.1. Comparison 1 Prophylactic platelet transfusion versus non prophylactic or therapeutic transfusion, Outcome 1 Mortality from all causes.                                        | 1.027 | .1057   | 9.977    | 2.15    | 0%       | 1.071  | .1502 | 7.642  | 1.043 | .3522  | 3.278  |        |        |        |
| CD002314  | Anti-leukotriene agents compared to inhaled corticosteroids in the management of recurrent and/or chronic asthma in adults and children | Anti-leukotriene vs inhaled glucocorticoids                                          | Analysis 1.66. Comparison 1 Anti-leukotriene (AL) vs. Inhaled glucocorticoids (in HFC-BDP equivalent), Outcome: Death.                                                                       | 1.036 | .0112   | 96.24    | 3.115   |          | 3.115  | .1263 | 76.81  | 3.006 | .1222  | 73.97  |        |        |        |
| CD005161  | Cyclosporin versus tacrolimus for liver transplanted patients                                                                           | Tacrolimus vs. Cyclosporin                                                           | Analysis 1.1. Comparison 1 Tacrolimus vs. Cyclosporin, Outcome 1 Mortality                                                                                                                   | 1.056 | .369    | 3.025    | .812    |          | .812   | .6647 | .992   | .7686 | .2737  | 2.159  |        |        |        |
| CD003407  | Erythropoietin or Darbepoetin for patients with cancer                                                                                  | Erythropoietin or darbepoetin vs placebo                                             | Analysis 5.1. Comparison 5 Overall Survival, Outcome 1 Overall survival updated review (unadjusted results).                                                                                 | 1.07  | .1479   | 7.748    | 1.051   |          | 1.051  | .9729 | 1.135  | .9818 | .1358  | 7.096  |        |        |        |
| CD003108* | Cotrimoxazole prophylaxis for opportunistic infections in adults with HIV (combined with pediatric CD003508)                            | Cotrimoxazole vs control                                                             | Analysis 1.1. Comparison 1 Cotrimoxazole vs control, Outcome 1 Death.                                                                                                                        | 1.175 | .7427   | 1.858    | .638    |          | .638   | .4812 | .8459  | .5431 | .3783  | .7797  |        |        |        |
| CD003038  | Beta-lactam versus beta-lactam-aminoglycoside combination therapy in cancer patients with neutropenia                                   | Beta-lactam vs beta-lactam-aminoglycoside combination therapy                        | Analysis 11.1. Comparison 11 Adults vs. children, Outcome 1 All cause mortality.                                                                                                             | 1.238 | .5158   | 2.974    | .91     |          | .91    | .7355 | 1.126  | .7348 | .3142  | 1.719  |        |        |        |
| CD000033  | Barbiturates for acute traumatic brain injury                                                                                           | Barbiturate vs control                                                               | Analysis 1.1. Comparison 1 Barbiturate vs control, Outcome 1 Death at the end of follow up.                                                                                                  | 1.287 | .3856   | 4.292    | 1.287   |          | 1.287  | .6356 | 2.604  | 1.000 | .3764  | 2.657  |        |        |        |
| CD001090  | Intravenous immunoglobulin for treating sepsis and septic shock                                                                         | IVIg vs placebo or no intervention                                                   | Analysis 1.1.(1-2) Comparison 1 IVIG versus placebo or no intervention, Outcome 1 All-cause mortality by type of IVIG, random effects. [ONLY SUBTOTALS] (Polyclonal IVIG: adults ; neonates) | 1.445 | .9415   | 2.217    | .9003   |          | .9003  | .8105 | 1.000  | .6252 | .4115  | .9438  |        |        |        |
| CD003341  | High first dose quinine regimen for treating severe malaria                                                                             | Loading dose vs no loading dose                                                      | Analysis 1.1. Comparison 1 High first (loading) dose compared with no loading dose, Outcome 1 Death.                                                                                         | 1.661 | .0653   | 42.24    | .9375   |          | .9375  | .0537 | 16.37  | .5645 | .1242  | 2.566  |        |        |        |

SUPPLEMENTAL TABLE 4 Continued

| Review   | Title                                                                                                                                  | Comparison                                                                         | Severe adverse events                                                                                                                     | sROR  |         | LCI_sROR |         | UCI_sROR |        | i2    | OR     |        | LCI OR |        | UCI OR |        |
|----------|----------------------------------------------------------------------------------------------------------------------------------------|------------------------------------------------------------------------------------|-------------------------------------------------------------------------------------------------------------------------------------------|-------|---------|----------|---------|----------|--------|-------|--------|--------|--------|--------|--------|--------|
|          |                                                                                                                                        |                                                                                    |                                                                                                                                           | ROR   | LCI ROR | UCI ROR  | LCI ROR | UCI ROR  | adults |       | adults | adults | adults | adults | adults | adults |
| CD002045 | Hypertonic versus near isotonic crystalloid for fluid resuscitation in critically ill patients (Trauma)                                | Hypertonic vs isotonic crystalloid                                                 | Analysis 1.1.1 Comparison 1 Hypertonic versus isotonic crystalloid, Outcome 1 Death. (trauma) [ONLY SUBTOTALS]                            | 1.25  | 0.73    | 2.15     | 0%      |          |        |       |        |        |        |        |        |        |
| CD000345 | Sequential combination of glucocorticosteroids and alfa interferon versus alfa interferon alone for HBeAg-positive chronic hepatitis B | Glucoc + IFN vs control + IFN                                                      | Analysis 1.1. Comparison 1 Glucoc + IFN versus Control + IFN (overall analyses at maximal follow-up), Outcome 1 Mortality.                | 5.066 | .2145   | 119.6    | .7816   | .4635    | 1.318  | .1543 | .0068  | 3.488  |        |        |        |        |
| CD003133 | Addition of anti-leukotriene agents to inhaled corticosteroids for chronic asthma                                                      | Leukotriene receptor antagonists + ICS vs same dose of ICS in symptomatic patients | Analysis 1.25. Comparison 1 Leukotriene Receptor Antagonists (LTRA) + ICS vs. same dose of ICS in SYMPTOMATIC patients, Outcome 25 Death. |       |         |          | .3463   | .014     | 8.556  |       |        |        |        |        |        |        |
| CD003992 | Oral versus intravenous antibiotic treatment for febrile neutropenia in cancer patients                                                | Oral vs intravenous antibiotic therapy                                             | Analysis 1.1. Comparison 1 Oral vs. intravenous antibiotic therapy, Outcome 1 Mortality.                                                  |       |         |          | 1.007   | .4437    | 2.286  |       |        |        |        |        |        |        |
| CD003039 | Colony stimulating factors for chemotherapy induced febrile neutropenia                                                                | Colony stimulating factor + antibiotics vs antibiotics alone                       | Analysis 1.1. Comparison 1 CSF + ATB vs ATB alone, Outcome 1 Mortality.                                                                   |       |         |          | .7009   | .428     | 1.148  |       |        |        |        |        |        |        |
| CD000059 | Clozapine versus typical medication for schizophrenia                                                                                  | Clozapine vs typical antipsychotics                                                | Analysis 2.1. Comparison 2 CLOZAPINE versus TYPICAL ANTIPSYCHOTICS - TREATMENT RESISTANT SCHIZOPHRENIA, Outcome 1 Death.                  |       |         |          | .637    | .2022    | 2.007  |       |        |        |        |        |        |        |

**Abbreviations:** LOI, low 95% confidence interval; OR, odds ratio (experimental vs control intervention); UCI, high 95% confidence interval; ROR, relative Odds ratio of Adults vs. Children (per each individual meta-analysis); sROR, summary Relative Odds Ratio of Adults vs Children (across all meta-analyses)

**Footnote:** Highlighted are the results that were statistically significant for any of the following: sROR (across all meta-analyses per harm/harm-related endpoint); ROR (for each individual meta-analysis of the OR in adult studies vs. the OR in pediatric studies); OR adults (OR of the experimental vs control intervention in the meta-analysis of adult studies); OR peds (OR of the experimental vs. control intervention in the meta-analysis of pediatric studies)

## REFERENCE

1. Contopoulos-Ioannidis DG, Baltogianni MS, Ioannidis JP. Comparative effectiveness of medical interventions in adults versus children. *J Pediatr*. 2010;157(2):322–330.e17

## SUPPLEMENTAL APPENDIX 2 REFERENCES OF COCHRANE SYSTEMATIC REVIEWS

1. Roberts I, Sydenham E. Barbiturates for acute traumatic brain injury. *Cochrane Database Syst Rev*. 1999;(3):CD000033 10.1002/14651858.CD000033
2. Essali A, Al-Haj Haasan N, Li C, Rathbone J. Clozapine versus typical neuroleptic medication for schizophrenia. *Cochrane Database Syst Rev*. 2009;1(1):CD000059 10.1002/14651858.CD000059.pub2
3. Alderson P, Roberts I. Corticosteroids for acute traumatic brain injury. *Cochrane Database Syst Rev*. 2005;1(1):CD000196 10.1002/14651858.CD000196.pub2
4. Arroll B, Kenealy T. Antibiotics for the common cold and acute purulent rhinitis. *Cochrane Database Syst Rev*. 2005;3(3):CD000247 10.1002/14651858.CD000247.pub2
5. Seow CH, Benchimol EI, Griffiths AM, Otleay AR, Steinhart AH. Budesonide for induction of remission in Crohn's disease. *Cochrane Database Syst Rev*. 2008;3(3):CD000296 10.1002/14651858.CD000296.pub3
6. Møllerup MT, Krogsgaard K, Mathurin P, Gluud C, Poynard T. Sequential combination of glucocorticosteroids and alpha interferon versus alpha interferon alone for HBeAg-positive chronic hepatitis B. *Cochrane Database Syst Rev*. 2005;3(3):CD000345 10.1002/14651858.CD000345.pub2
7. McIntosh HM, Olliaro P. Artemisinin derivatives for treating severe malaria. *Cochrane Database Syst Rev*. 2000;2(2):CD000527 10.1002/14651858.CD000527
8. Alejandria MM, Lansang MAD, Dans LF, Mantaring JB III. Intravenous immunoglobulin for treating sepsis, severe sepsis and septic shock. *Cochrane Database Syst Rev*. 2013;9(1):CD001090 10.1002/14651858.CD001090
9. Sirinavin S, Garner P. Antibiotics for treating salmonella gut infections. *Cochrane Database Syst Rev*. 2000;2(1):CD001167 10.1002/14651858.CD001167
10. Abramson MJ, Puy RM, Weiner JM. Injection allergen immunotherapy for asthma. *Cochrane Database Syst Rev*. 2010;8(8):CD001186 10.1002/14651858.CD001186.pub2
11. Alderson P, Bunn F, Lefebvre C, Li WP, Roberts I, Schierhout G, Albumin Reviewers. Human albumin solution for resuscitation and volume expansion in critically ill patients. *Cochrane Database Syst Rev*. 2004;(4):CD001208 10.1002/14651858.CD001208.pub2
12. Bunn F, Trivedi D, Ashraf S. Colloid solutions for fluid resuscitation. *Cochrane Database Syst Rev*. 2008;1(1):CD001319 10.1002/14651858.CD001319.pub2
13. Walters EH, Gibson PG, Lasserson TJ, Walters JAE. Long-acting beta2-agonists for chronic asthma in adults and children where background therapy contains varied or no inhaled corticosteroid. *Cochrane Database Syst Rev*. 2007;1(1):CD001385 10.1002/14651858.CD001385.pub2
14. Marson AG, Kadir ZA, Hutton JL, Chadwick DW. Gabapentin add-on for drug-resistant partial epilepsy. *Cochrane Database Syst Rev*. 2000;3(1):CD001415 10.1002/14651858.CD001415
15. Jette N, Hemming K, Hutton JL, Marson AG. Topiramate add-on for drug-resistant partial epilepsy. *Cochrane Database Syst Rev*. 2008;3(3):CD001417 10.1002/14651858.CD001417.pub2
16. Rowe BH, Bretzlaff JA, Bourdon C, Bota GW, Camargo CA Jr. Magnesium sulfate for treating exacerbations of acute asthma in the emergency department. *Cochrane Database Syst Rev*. 2000;2(1):CD001490 10.1002/14651858.CD001490
17. Smucny J, Becker LA, Glazier R. Beta2-agonists for acute bronchitis. *Cochrane Database Syst Rev*. 2006;4(4):CD001726 10.1002/14651858.CD001726.pub3
18. Tudur Smith C, Marson AG, Williamson PR. Phenytoin versus valproate monotherapy for partial onset seizures and generalized onset tonic-clonic seizures. *Cochrane Database Syst Rev*. 2001;4(4):CD001769 10.1002/14651858.CD001769
19. Ramaratnam S, Marson AG, Baker GA. Lamotrigine add-on for drug-resistant partial epilepsy. *Cochrane Database Syst Rev*. 2001;3(3):CD001909 10.1002/14651858.CD001909
20. Tudur Smith C, Marson AG, Clough HE, Williamson PR. Carbamazepine versus phenytoin monotherapy for epilepsy. *Cochrane Database Syst Rev*. 2002;2(2):CD001911 10.1002/14651858.CD001911
21. Panpanich R, Lerttrakarnnon P, Laopaiboon M. Azithromycin for acute lower respiratory tract infections. *Cochrane Database Syst Rev*. 2008;1(1):CD001954 10.1002/14651858.CD001954.pub3
22. Castillo SM, Schmidt DB, White S, Shukralla A. Oxcarbazepine add-on for drug-resistant partial epilepsy. *Cochrane Database Syst Rev*. 2000;3(3):CD002028 10.1002/14651858.CD002028
23. Bunn F, Roberts IG, Tasker R, Akpa E. Hypertonic versus near isotonic crystalloid for fluid resuscitation in critically ill patients. *Cochrane Database Syst Rev*. 2004;3(3):CD002045 10.1002/14651858.CD002045.pub2
24. Bjerre LM, Verheij TJM, Kochen MM. Antibiotics for community acquired pneumonia in adult outpatients. *Cochrane Database Syst Rev*. 2009;4(4):CD002109 10.1002/14651858.CD002109.pub3 (combined with pediatric CD004874)
25. Meremikwu MM, Marson AG. Routine anti-convulsants for treating cerebral malaria. *Cochrane Database Syst Rev*. 2002;2(2):CD002152 10.1002/14651858.CD002152
26. Rowe BH, Spooner C, Ducharme FM, Bretzlaff JA, Bota GW. Early emergency department treatment of acute asthma with systemic corticosteroids. *Cochrane Database Syst Rev*. 2001;1(1):CD002178 10.1002/14651858.CD002178
27. Taylor S, Tudur Smith C, Williamson PR, Marson AG. Phenobarbitone versus phenytoin monotherapy for partial onset seizures and generalized onset tonic-clonic seizures. *Cochrane Database Syst Rev*. 2001;4(2):CD002217 10.1002/14651858.CD002217
28. De Bruyn G, Hahn S, Borwick A. Antibiotic treatment for travellers' diarrhoea. *Cochrane Database Syst Rev*. 2000;3(3):CD002242 10.1002/14651858.CD002242
29. Ducharme FM, Hicks GC. Anti-leukotriene agents compared to inhaled corticosteroids in the management of recurrent and/or chronic asthma in adults and children. *Cochrane Database Syst Rev*. 2002;3(1):CD002314 10.1002/14651858.CD002314.pub2
30. Paul M, Dickstein Y, Schlesinger A, Grozinsky-Glasberg S, Soares-Weiser K, Leibovici L. Beta-lactam versus beta-lactam-aminoglycoside combination therapy in cancer patients with neutropenia. *Cochrane Database Syst Rev*. 2013;6(3):CD003038 10.1002/14651858.CD003038
31. Clark OAC, Lyman G, Castro AA, Clark LGO, Djulbegovic B. Colony stimulating factors for chemotherapy induced febrile neutropenia. *Cochrane Database Syst Rev*. 2003;3(4):CD003039 10.1002/14651858.CD003039
32. Grimwade K, Swingler GH. Cotrimoxazole prophylaxis for opportunistic infections in adults with HIV. *Cochrane Database Syst Rev*. 2003;3(3):CD003108 10.1002/14651858.CD003108 (combined with pediatric CD003508)
33. Ducharme FM, Schwartz Z, Hicks G, Kakuma R. Addition of anti-leukotriene agents to inhaled corticosteroids for chronic asthma. *Cochrane Database Syst Rev*. 2004;2(1):CD003133 10.1002/14651858.CD003133.pub2
34. Adams NP, Bestall JC, Jones P. Budesonide versus placebo for chronic asthma in children and adults. *Cochrane Database Syst Rev*. 1999;(4):CD003274 10.1002/14651858.CD003274

35. Lesi AFE, Meremikwu MM. High first dose quinine regimen for treating severe malaria. *Cochrane Database Syst Rev.* 2004;3(3):CD003341 10.1002/14651858.CD003341.pub2
36. Bohlius J, Wilson J, Seidenfeld J, et al. Erythropoietin or darbepoetin for patients with cancer. *Cochrane Database Syst Rev.* 2006;3(3):CD003407 10.1002/14651858.CD003407.pub4
37. Grimwade K, Swingler GH. Cotrimoxazole prophylaxis for opportunistic infections in children with HIV infection. *Cochrane Database Syst Rev.* 2006;(1):CD003508 10.1002/14651858.CD003508.pub2 (combined with adult CD003108)
38. Guevara JP, Ducharme FM, Keren R, Nihtianova S, Zorc J. Inhaled corticosteroids versus sodium cromoglycate in children and adults with asthma. *Cochrane Database Syst Rev.* 2006;2(2):CD003558 10.1002/14651858.CD003558.pub2
39. Walker S, Monteil M, Phelan K, Lasserson TJ, Walters EH. Anti-IgE for chronic asthma in adults and children. *Cochrane Database Syst Rev.* 2006;2(2):CD003559 10.1002/14651858.CD003559.pub3
40. Muller M, Marson AG, Williamson PR. Oxcarbazepine versus phenytoin monotherapy for epilepsy. *Cochrane Database Syst Rev.* 2006;2(2):CD003615 10.1002/14651858.CD003615.pub2
41. Prasad K, Al-Roomi K, Krishnan PR, Sequeira R. Anticonvulsant therapy for status epilepticus. *Cochrane Database Syst Rev.* 2005;4(4):CD003723 10.1002/14651858.CD003723.pub2
42. Murphy CK, Hahn S, Volmink J. Reduced osmolarity oral rehydration solution for treating cholera. *Cochrane Database Syst Rev.* 2004;4(4):CD003754 10.1002/14651858.CD003754.pub2
43. Walters EH, Walters JAE, Gibson PW. Regular treatment with long acting beta agonists versus daily regular treatment with short acting beta agonists in adults and children with stable asthma. *Cochrane Database Syst Rev.* 2002;4(3):CD003901 10.1002/14651858.CD003901
44. Vidal L, Paul M, Ben-Dor I, Pokroy E, Soares-Weiser K, Leibovici L. Oral versus intravenous antibiotic treatment for febrile neutropenia in cancer patients. *Cochrane Database Syst Rev.* 2004;4(4):CD003992 10.1002/14651858.CD003992.pub2
45. Macritchie K, Geddes JR, Scott J, Haslam DR, de Lima M, Goodwin G. Valproate for acute mood episodes in bipolar disorder. *Cochrane Database Syst Rev.* 2003;1(1):CD004052 10.1002/14651858.CD004052
46. Carlisle JB, Stevenson CA. Drugs for preventing postoperative nausea and vomiting. *Cochrane Database Syst Rev.* 2006;3(3):CD004125 10.1002/14651858.CD004125.pub2
47. Stanworth SJ, Hyde C, Heddle N, Rebutta P, Brunskill S, Murphy MF. Prophylactic platelet transfusion for haemorrhage after chemotherapy and stem cell transplantation. *Cochrane Database Syst Rev.* 2004;4(4):CD004269 10.1002/14651858.CD004269.pub2
48. Gafter-Gvili A, Fraser A, Paul M, van de Wetering MD, Kremer LCM, Leibovici L. Antibiotic prophylaxis for bacterial infections in afebrile neutropenic patients following chemotherapy. *Cochrane Database Syst Rev.* 2005;4(4):CD004386 10.1002/14651858.CD004386.pub2
49. Brouwer MC, McIntyre P, de Gans J, Prasad K, van de Beek D. Corticosteroids for acute bacterial meningitis. *Cochrane Database Syst Rev.* 2010;9(9):CD004405 10.1002/14651858.CD004405.pub3
50. Osei-Akoto A, Orton LC, Owusu-Ofori SP. Atovaquone-proguanil for treating uncomplicated malaria. *Cochrane Database Syst Rev.* 2005;4(4):CD004529 10.1002/14651858.CD004529.pub2
51. Kabra SK, Lodha R, Pandey RM. Antibiotics for community-acquired pneumonia in children. *Cochrane Database Syst Rev.* 2010;(3):CD004874 10.1002/14651858.CD004874.pub3 (combined with adult CD002109)
52. Haddad EM, McAlister VC, Renouf E, Malthaner R, Kjaer MS, Gluud LL. Cyclosporin versus tacrolimus for liver transplanted patients. *Cochrane Database Syst Rev.* 2006;4(4):CD005161 10.1002/14651858.CD005161.pub2
53. Ducharme FM, Ni Chroinin M, Greenstone I, Lasserson TJ. Addition of long-acting beta2-agonists to inhaled steroids versus higher dose inhaled steroids in adults and children with persistent asthma. *Cochrane Database Syst Rev.* 2010;4(4):CD005533 10.1002/14651858.CD005533.pub2
54. Ducharme FM, Ni Chroinin M, Greenstone I, Lasserson TJ. Addition of long-acting beta2-agonists to inhaled corticosteroids versus same dose inhaled corticosteroids for chronic asthma in adults and children. *Cochrane Database Syst Rev.* 2010;5(5):CD005535 10.1002/14651858.CD005535.pub2
55. Omari AAA, Gamble CL, Garner P. Artemether-lumefantrine (four-dose regimen) for treating uncomplicated falciparum malaria. *Cochrane Database Syst Rev.* 2006;2(2):CD005965 10.1002/14651858.CD005965
56. Graves PM, Gelband H. Vaccines for preventing malaria (pre-erythrocytic). *Cochrane Database Syst Rev.* 2006;4(4):CD006198 10.1002/14651858.CD006198
